# Supplementary material
Source: PubMed Central journal article supplement (PMC2830791)
Supplement: NIHMS177983-supplement-1_si_001.pdf [file NIHMS177983-supplement-1_si_001.pdf]

## A Concise Enantioselective Synthesis of the Chlorosulfolipid Malhamensilipin A

D. Karl Bedke, Grant M. Shibuya, Alban R. Pereira, William H. Gerwick, and Christopher D. Vanderwal

*Department of Chemistry, University of California, Irvine, CA 92697; Center for Marine Biotechnology and Biomedicine, Scripps Institution of Oceanography, University of California, San Diego, La Jolla, CA 92093*

### SUPPORTING INFORMATION

#### Table of Contents

|                                                                            |            |
|----------------------------------------------------------------------------|------------|
| <b>I. General</b>                                                          | <b>S1</b>  |
| <b>II. Experimental Procedures and Characterization of New Compounds</b>   | <b>S2</b>  |
| <b>III. Dichlorination Diastereoselectivity for Derivatives of Diol S3</b> | <b>S9</b>  |
| <b>IV. NMR Spectra</b>                                                     | <b>S10</b> |

#### I. General

<sup>1</sup>H NMR and <sup>13</sup>C NMR spectra were recorded at ambient temperature using Bruker DRX spectrometers at either 500 or 600 MHz (<sup>1</sup>H) and 125 MHz (<sup>13</sup>C). Chemical shifts are reported in parts per million (ppm) using the solvent residual as the internal reference. Coupling constants are reported in Hertz (Hz) and the peak multiplicity is listed as follows: s, singlet; d, doublet; t, triplet; q, quartet; m, multiplet. Infrared (IR) spectra were obtained using a Perkin-Elmer Spectrum RXI FT-IR instrument. High-resolution mass spectra were obtained with a Waters LCT Premier mass spectrometer. All column chromatography was performed using Dynamic Adsorbents 230-400 mesh silica gel (SiO<sub>2</sub>) with the indicated solvent system, unless otherwise noted. All reactions were conducted under a nitrogen or argon atmosphere using flame-dried or oven-dried glassware. All reaction solvents were dried by passing through activated alumina columns.

## II. Experimental Procedures and Characterization of New Compounds

Synthesis of malhamensilipin A

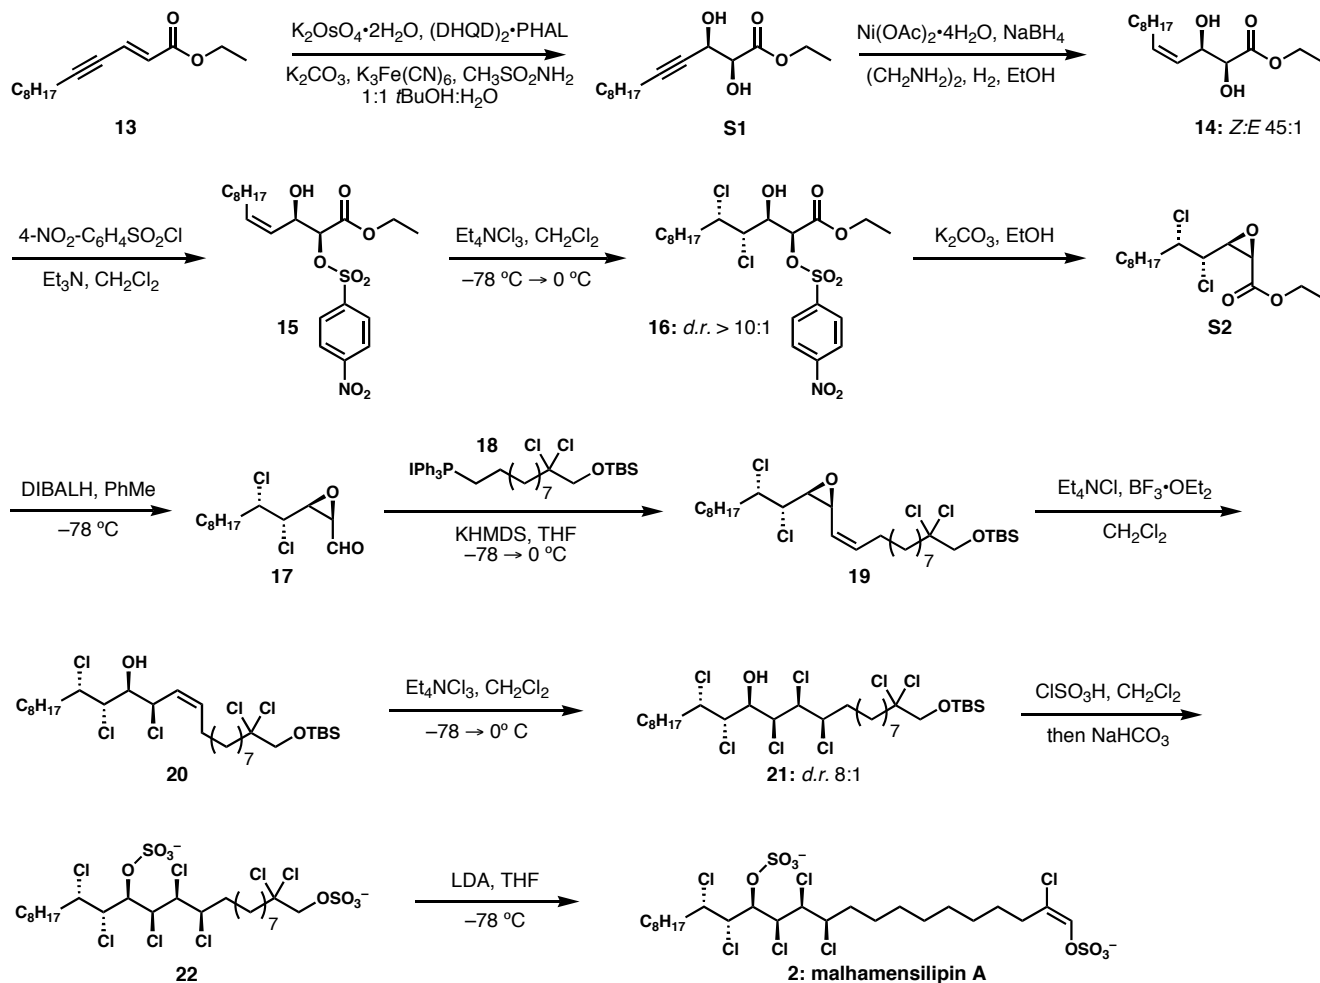

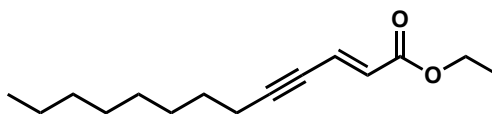

**(E)-Ethyl tridec-2-en-4-ynoate (13):**

After stirring triethylphosphonoacetate (2.50 mL, 12.5 mmol) and LiBr (4.18 g, 48.3 mmol) in dry THF (230 mL) for 10 min, Et<sub>3</sub>N was added to the stirring solution. After stirring for 15 min, undec-2-ynal<sup>1</sup> (1.87 g, 11.2 mmol) was added as a solution in hexanes (2 mL). After stirring at room temperature for 1 h, the reaction was quenched by pouring into saturated aqueous NH<sub>4</sub>Cl (100 mL). The layers were separated and the aqueous layer extracted with hexanes (3 x 50 mL). The combined organic extracts were washed with brine (50 mL), dried with MgSO<sub>4</sub>, filtered and concentrated. Chromatographic purification (20:1, hexanes:EtOAc) furnished **13**<sup>2</sup> (1.82 g, 7.70 mmol, 69%): R<sub>f</sub> = 0.36 (20:1 hexanes:EtOAc); <sup>1</sup>H NMR (500 MHz, CDCl<sub>3</sub>) δ 6.76 (dt, *J* = 15.8, 2.3 Hz, 1H, H-3), 6.14 (d, *J* = 15.8, 1H, H-2), 4.21 (q, *J* = 7.1 Hz, 2H, RCO<sub>2</sub>CH<sub>2</sub>CH<sub>3</sub>), 2.37 (td, *J* = 7.1, 2.2 Hz, 2H, H-6), 1.56 (p, *J* = 5.5 Hz, 2H, H-7), 1.42–1.37 (m, 2H, H-8), 1.32–1.26 (m, 11H), 0.89 (t, *J* = 7.0 Hz, 3H, H-13); <sup>13</sup>C NMR (125 MHz, CDCl<sub>3</sub>) δ 166.2, 129.3, 126.1, 100.9, 78.0, 60.6, 31.8, 29.2, 29.1, 28.9, 28.3, 22.7, 19.8, 14.2, 14.1; IR 2929, 2856, 2215, 1716, 1620, 1301, 1178, 962 cm<sup>-1</sup>; HRMS (CI) *m/z* calcd for C<sub>15</sub>H<sub>24</sub>O<sub>2</sub>Na [M+Na]<sup>+</sup> 259.1674, found 259.1671.

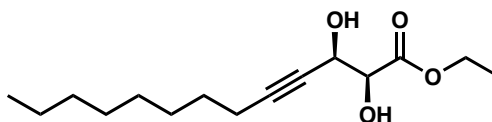

**(-)-(2S,3R)-Ethyl 2,3-dihydroxytridec-4-ynoate (S1):**

K<sub>2</sub>OsO<sub>4</sub>·2H<sub>2</sub>O (147 mg, 0.390 mmol), (DHQD)<sub>2</sub>PHAL (601 mg, 0.772 mmol), K<sub>3</sub>Fe(CN)<sub>6</sub> (7.62 g, 23.1 mmol) and K<sub>2</sub>CO<sub>3</sub> (3.22 g, 23.1 mmol) were vigorously stirred in 140 mL of 1:1 <sup>t</sup>BuOH:H<sub>2</sub>O at room temperature for 1 h. Methanesulfonamide (728 mg, 7.65 mmol) was added and stirring continued for 30 min. Enyne **13** (1.82 g, 7.70 mmol) was added as a solution in 14 mL of 1:1 <sup>t</sup>BuOH:H<sub>2</sub>O. The reaction mixture was stirred for 26 h at room temperature, cooled to 0 °C and quenched by addition of Na<sub>2</sub>SO<sub>3</sub> (11.6 g). The ice bath was removed and the mixture was stirred for 30 min at room temperature. The layers were separated and the aqueous layer was extracted with ethyl acetate (3 x 100 mL). The combined organic layers were dried with Na<sub>2</sub>SO<sub>4</sub>, filtered and concentrated. Purification by column chromatography (2:1 hexanes:EtOAc) yielded recovered starting ester (336 mg, 1.42 mmol, 18%) and **S1** (1.21 g 4.48 mmol, 58%, >95% ee<sup>3</sup>): R<sub>f</sub> = 0.34 (2:1 hexanes:EtOAc); [α]<sub>D</sub><sup>24</sup> = -4.1 (c 0.31, CH<sub>2</sub>Cl<sub>2</sub>); <sup>1</sup>H NMR (500 MHz, CDCl<sub>3</sub>) δ 4.65 (d, *J* = 5.5 Hz, 1H, H-3), 4.32 (q, *J* = 7.1 Hz, 2H, RCO<sub>2</sub>CH<sub>2</sub>CH<sub>3</sub>), 4.25 (s, 1H, H-2), 3.18 (s, 1H, C2-OH), 2.55–2.50 (m, 1H, C3-OH), 2.23 (dt, *J* = 7.3, 1.7 Hz, 2H, H-6), 1.51 (p, *J* = 7.5 Hz, 2H, H-7), 1.39–1.24 (m, 12H), 0.89 (t, *J* = 6.8 Hz, 3H, H-13); <sup>13</sup>C NMR (125 MHz, CDCl<sub>3</sub>) δ 172.1, 87.6, 77.4, 74.0, 64.3, 62.6, 32.0, 29.4, 29.3, 29.1, 28.7, 22.9,

1) Prepared by formylation of decyne with piperidine carbaldehyde: He, L.; Byun, H.S.; Bittman, R. *J. Org. Chem.* **2000**, *65*, 7627–7633.

2) Dixon, D.J.; Lucas, A. C. *Synlett* **2004**, 1092–1094.

3) The ee was determined by <sup>1</sup>H and <sup>19</sup>F NMR analysis of the corresponding bis-Mosher esters derived from both enantiomers of Mosher acid (see ref. 1).

18.9, 14.4, 14.3; IR 3434, 2927, 2856, 2232, 1742, 1272  $\text{cm}^{-1}$ ; HRMS (ESI)  $m/z$  calcd for  $\text{C}_{15}\text{H}_{26}\text{O}_4\text{Na}$   $[\text{M}+\text{Na}]^+$  293.1729, found 293.1732.

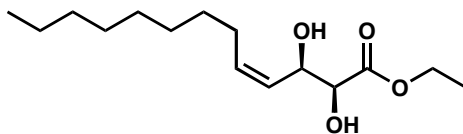

**(+)-(2*S*,3*R*,*Z*)-Ethyl 2,3-dihydroxytridec-4-enoate (14):**

$\text{Ni}(\text{OAc})_2 \cdot 4\text{H}_2\text{O}$  (156 mg, 0.628 mmol) was dissolved in ethanol (10 mL) and then cooled to 0 °C.  $\text{NaBH}_4$  (22.5 mg, 0.594 mmol) was added to the vigorously stirring green solution, which immediately turned black upon addition. The reaction flask was stirred at room temperature for five min and ethylenediamine (80.0  $\mu\text{L}$ , 1.20 mmol) was added and stirring was continued for five min more. Alkyne **13** (800 mg, 2.96 mmol) in ethanol (6 mL) was added, the atmosphere was exchanged from argon to hydrogen and the mixture was stirred for 1 h. The reaction mixture was partitioned between water and  $\text{CH}_2\text{Cl}_2$ . After separation of the layers, the aqueous layer was extracted with  $\text{CH}_2\text{Cl}_2$  (3 x 20 mL). The combined extracts were filtered through a pad of  $\text{SiO}_2$  and the pad was washed with EtOAc until no more diol was visible by TLC. This dark yellow solution was concentrated and filtered two times more through a pad of silica, both times eluting with EtOAc to yield **14** (704 mg, 2.58 mmol, 88%):  $R_f = 0.49$  (2:1 toluene:EtOAc);  $[\alpha]_D^{25} = +15.9$  ( $c = 0.304$ ,  $\text{CH}_2\text{Cl}_2$ );  $^1\text{H}$  NMR (500 MHz,  $\text{CDCl}_3$ )  $\delta$  5.67–5.62 (m, 1H, H-5), 5.60–5.55 (m, 1H, H-4), 4.70 (dt,  $J = 10.2, 2.8$  Hz, 1H, H-3), 4.35–4.26 (m, 2H,  $\text{RCO}_2\text{CH}_2\text{CH}_3$ ), 4.09 (dd,  $J = 6.1, 2.9$  Hz, 1H, H-2), 3.11 (d,  $J = 6.5$ , 1H, C2-OH), 2.21–2.06 (m, 3H, H-6, C3-OH), 1.41–1.27 (m, 15H), 0.89 (t,  $J = 7.0$  Hz, 3H, H-13);  $^{13}\text{C}$  NMR (125 MHz,  $\text{CDCl}_3$ )  $\delta$  173.0, 135.1, 127.5, 74.3, 68.8, 62.3, 32.1, 29.7, 29.6, 29.4 (2C), 28.1, 22.9, 14.4, 14.3; IR 3448, 2925, 1736, 1112  $\text{cm}^{-1}$ ; HRMS (ESI)  $m/z$  calcd for  $\text{C}_{15}\text{H}_{28}\text{O}_4\text{Na}$   $[\text{M}+\text{Na}]^+$  295.1885, found 295.1880.

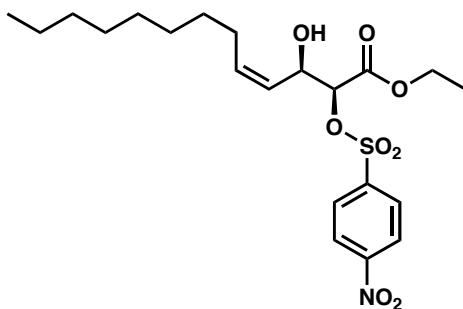

**(-)-(2*S*,3*R*,*Z*)-Ethyl 3-hydroxy-2-(4-nitrophenylsulfonyloxy)tridec-4-enoate (15):**

Triethylamine (0.49 mL, 3.51 mmol) was added to a solution of diol **14** (704 mg, 2.58 mmol) in  $\text{CH}_2\text{Cl}_2$  (13 mL). 4-Nitrobenzenesulfonyl chloride (629 mg, 2.84 mmol) was added in a single portion at room temperature and the reaction was stirred for 1 h. The reaction was quenched by addition of 1 M HCl (10 mL). The phases were separated, the organic layer was washed with saturated aqueous  $\text{NaHCO}_3$  (10 mL), brine (10 mL), dried with  $\text{Na}_2\text{SO}_4$ , filtered and concentrated. Purification by column chromatography (30:1  $\text{CH}_2\text{Cl}_2$ :EtOAc) yielded **15** (910 mg, 1.99 mmol, 77%):  $R_f = 0.44$  (20:1  $\text{CH}_2\text{Cl}_2$ :EtOAc);  $[\alpha]_D^{24} = -40.6$  ( $c = 0.950$ ,  $\text{CH}_2\text{Cl}_2$ );  $^1\text{H}$  NMR (500 MHz,  $\text{CDCl}_3$ )  $\delta$  8.40 (d,  $J = 8.9$

Hz, 2H, NO<sub>2</sub>-C-CH), 8.18 (d, *J* = 8.9 Hz, 2H, OSO<sub>2</sub>C-CH), 5.66 (dt, *J* = 10.9, 7.6 Hz, 1H, H-5), 5.40 (ddt, *J* = 10.7, 8.8, 1.4 Hz, 1H, H-4), 4.92–4.87 (m, 2H, H-2, H-3), 4.18 (q, *J* = 7.2 Hz, 2H, RCO<sub>2</sub>CH<sub>2</sub>CH<sub>3</sub>), 2.16–2.00 (m, 3H, H-6, OH), 1.38–1.22 (m, 12H), 0.89 (t, *J* = 6.9 Hz, 3H, H-13); <sup>13</sup>C NMR (125 MHz, CDCl<sub>3</sub>) δ 166.5, 151.0, 142.2, 137.3, 129.8 (2C), 124.9, 124.5 (2C), 81.6, 67.8, 62.6, 32.0, 29.6, 29.5, 29.43, 29.41, 28.2, 22.9, 14.3, 14.2; IR 3527, 3108, 2927, 1750, 1535, 1189 cm<sup>-1</sup>; HRMS (ESI) calcd for C<sub>21</sub>H<sub>31</sub>NO<sub>8</sub>SNa [M+Na]<sup>+</sup> 480.1668, found 480.1669.

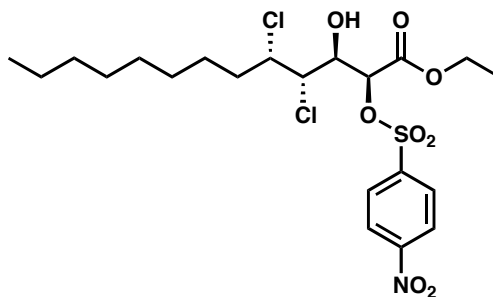

**(-)-(2*S*,3*S*,4*S*,5*S*)-Ethyl 4,5-dichloro-3-hydroxy-2-(4-nitrophenylsulfonyloxy)tridecanoate (**16**):**

Ester **15** (842 mg, 1.84 mmol) was dissolved in CH<sub>2</sub>Cl<sub>2</sub> (6.4 mL) and the reaction mixture was cooled to -78 °C. Et<sub>4</sub>NCl<sub>3</sub> (705 mg, 2.98 mmol) was added to the stirring solution, which was allowed to warm to 0 °C over 1.5 h. The reaction was quenched by addition of saturated aqueous Na<sub>2</sub>S<sub>2</sub>O<sub>3</sub> (3 mL). The mixture was partitioned between CH<sub>2</sub>Cl<sub>2</sub> and water. After separation, the aqueous layer was extracted with CH<sub>2</sub>Cl<sub>2</sub> (3 x 10 mL), the combined organic extracts were dried over Na<sub>2</sub>SO<sub>4</sub>, filtered, and concentrated. Purification by column chromatography (40:1 CH<sub>2</sub>Cl<sub>2</sub>:EtOAc) yielded **16** (803 mg, 1.52 mmol, 83%, >10:1 mixture of diastereomers): R<sub>f</sub> = 0.70 (20:1 CH<sub>2</sub>Cl<sub>2</sub>:EtOAc); [α]<sub>D</sub><sup>24</sup> = -19.6 (c = 0.830, CH<sub>2</sub>Cl<sub>2</sub>); <sup>1</sup>H NMR (500 MHz, C<sub>6</sub>D<sub>6</sub>) δ 7.68 (d, *J* = 8.7 Hz, 2H, NO<sub>2</sub>-C-CH), 7.54 (d, *J* = 8.7 Hz, 2H, ROSO<sub>2</sub>-C-CH), 5.80 (1H, H-2), 4.62 (apparent t, *J* = 9.4, 8.9 Hz, 1H, H-3), 4.27 (dd, *J* = 9.4, 5.4 Hz, 1H, H-5), 4.01 (d, *J* = 9.8 Hz, 1H, H-4) 3.84–3.74 (m, 2H, RO<sub>2</sub>CH<sub>2</sub>CH<sub>3</sub>), 2.32 (d, *J* = 8.6 Hz, 1H, OH), 1.89–1.82 (m, 1H, H-6), 1.45–1.41 (m, 1H, H-6), 1.37–1.00 (m, 12H), 0.92 (t, *J* = 7.1 Hz, 3H, H-13), 0.78 (t, *J* = 7.2 Hz, 3H, RO<sub>2</sub>CH<sub>2</sub>CH<sub>3</sub>); <sup>13</sup>C NMR (125 MHz, C<sub>6</sub>D<sub>6</sub>) 167.2, 151.1, 142.2, 129.8 (2C), 124.4 (2C), 78.9, 74.0, 63.3, 63.0, 62.0, 36.9, 32.6, 30.1, 30.0, 29.7, 27.2, 23.4, 14.7, 14.1; IR 3504, 3109, 2928, 2856, 1763, 1534, 1189 cm<sup>-1</sup>; HRMS (ESI) calcd for C<sub>21</sub>H<sub>31</sub>Cl<sub>2</sub>NO<sub>8</sub>SNa [M+Na]<sup>+</sup> 550.1045, found 550.1037.

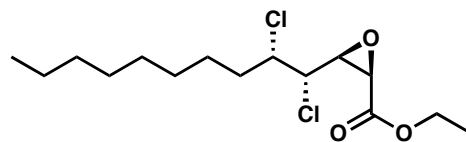

**(-)-(2*R*,3*S*,4*S*,5*S*)-Ethyl 4,5-dichloro-2,3-epoxy-tridecanoate (**S2**):**

K<sub>2</sub>CO<sub>3</sub> (400 mg, 2.97 mmol) was added to a solution of **16** (782 mg, 1.48 mmol) in EtOH (15 mL). After 6 h, the reaction was deemed complete base on TLC analysis. The reaction solution was poured into saturated aqueous NaHCO<sub>3</sub> (10 mL), diluted with water to dissolve the solids, and extracted with CH<sub>2</sub>Cl<sub>2</sub> (3 x 10 mL). The combined extracts were washed with brine, dried with Na<sub>2</sub>SO<sub>4</sub>, filtered and concentrated. The concentrate was filtered through a small plug of SiO<sub>2</sub> and eluted with CH<sub>2</sub>Cl<sub>2</sub> to yield **S2** (422 mg, 1.30 mmol, 88%): R<sub>f</sub> = 0.34 (1:1 hexanes:CH<sub>2</sub>Cl<sub>2</sub>); [α]<sub>D</sub><sup>24</sup> = -65.8 (c = 1.18,

CH<sub>2</sub>Cl<sub>2</sub>); <sup>1</sup>H NMR (500 MHz, C<sub>6</sub>D<sub>6</sub>) δ 4.44 (d, *J* = 8.6 Hz, 1H, H-4), 4.20 (ddd, *J* = 8.9, 5.0, 2.5 Hz, 1H, H-5), 3.89 (dq *J* = 10.8, 7.1 Hz, 1H, RCO<sub>2</sub>CH<sub>2</sub>CH<sub>3</sub>), 3.82 (dq *J* = 10.8, 7.1 Hz, 1H, RCO<sub>2</sub>CH<sub>2</sub>CH<sub>3</sub>), 3.50 (dd, *J* = 8.6, 4.3 Hz, 1H, H-3), 3.18 (d, *J* = 4.3 Hz, 1H, H-2), 1.85–1.78 (m, 1H, H-6), 1.55–1.49 (m, 1H, H-6), 1.40–0.95 (m, 12H), 0.89 (t, *J* = 7.2 Hz, 3H, RCO<sub>2</sub>CH<sub>2</sub>CH<sub>3</sub>), 0.85 (t, *J* = 7.1 Hz, 1H, H-10); <sup>13</sup>C NMR (125 MHz, C<sub>6</sub>D<sub>6</sub>) δ 167.7, 64.1, 62.1, 60.2, 58.0, 52.9, 35.6, 32.5, 30.0, 29.9, 29.5, 26.9, 23.4, 14.7, 14.3; IR 2927, 2856, 1750, 1206 cm<sup>-1</sup>; HRMS (ESI) *m/z* calcd for C<sub>15</sub>H<sub>26</sub>Cl<sub>2</sub>O<sub>3</sub>Na [M+Na]<sup>+</sup> 347.1157, found 347.1163.

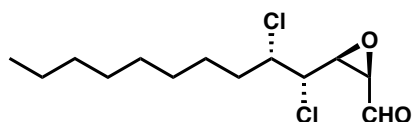

**(-)-(2*R*,3*S*,4*S*,5*S*)-4,5-Dichloro-2,3-epoxytridecanal (17):**

DIBAL-H (2.2 mL, 2.2 mmol, 1.0 M in toluene) was added down the neck of a reaction flask cooled to -78 °C containing ester **S2** (424 mg, 1.30 mmol) in toluene (13 mL). After stirring for 2 h at this temperature, MeOH (10 mL) was slowly added in the same manner as before, and the reaction mixture was stirred for 10 min and warmed to room temperature over 1 h. The reaction mixture was filtered, and the residual solids were exhaustively washed with EtOAc. The residue was subjected to purification via column chromatography (1:1 CH<sub>2</sub>Cl<sub>2</sub>:hexanes) and yielded **17** (328 mg, 1.2 mmol, 90%) as a white solid (m.p. 58–60 °C): *R<sub>f</sub>* = 0.21 (1:1 hexanes:CH<sub>2</sub>Cl<sub>2</sub>); [α]<sub>D</sub><sup>24</sup> = -35.3 (c = 0.250, CH<sub>2</sub>Cl<sub>2</sub>); <sup>1</sup>H NMR (600 MHz, C<sub>6</sub>D<sub>6</sub>) δ 8.89 (d, *J* = 1.8 Hz, 1H, H-1), 4.04 (ddd, *J* = 9.2, 4.5, 2.7 Hz, 1H, H-5), 3.71 (dd, *J* = 8.7, 2.6 Hz, 1H, H-4), 3.40 (dd, *J* = 8.7, 4.5 Hz, 1H, H-3), 2.79 (dd, *J* = 4.5, 2.1 Hz, 1H, H-2), 1.77–1.71 (m, 1H, H-6), 1.44–1.39 (m, 1H, H-6), 1.36–1.30 (m, 1H), 1.29–1.24 (m, 2H), 1.23–1.15 (m, 4H), 1.13–1.08 (m, 2H), 1.07–0.98 (m, 3H), 0.91 (t, *J* = 7.2 Hz, 3H, H-13); <sup>13</sup>C (125 MHz C<sub>6</sub>D<sub>6</sub>) δ 195.5, 63.9, 60.0, 59.9, 57.4, 36.3, 32.5, 30.0, 29.9, 29.5, 26.8 23.4, 14.7; IR 2946, 2923, 2853, 1714, 1463, 847, 640 cm<sup>-1</sup>; HRMS (ESI) *m/z* calcd for C<sub>13</sub>H<sub>22</sub>Cl<sub>2</sub>O<sub>2</sub>Na [M+Na]<sup>+</sup> 303.0894, found 303.0891.

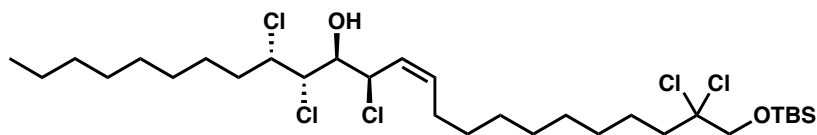

**(+)-(13*R*,14*S*,15*S*,16*S*,*Z*)-1-(*tert*-Butyldimethylsilyloxy)-2,2,13,15,16-pentachlorotetracos-11-en-14-ol (20):**

Phosphonium salt **18**<sup>4</sup> (479 mg, 0.644 mmol) was dried under vacuum at 75 °C for 16 h, dissolved in dry THF (3 mL) and cooled to -78 °C. KHMDS (0.93 mL, 0.46 mmol, 0.5 M solution in toluene) was added and after 5 min the reaction flask was placed in an ice bath and the reaction was stirred for 20 min. The bright orange solution was cooled back to -78 °C and aldehyde **17** (87 mg, 0.31 mmol) in THF (2 mL) was added via cannula, and the bright orange color dissipated. The bath temperature was

4) Bedke, D.K.; Shibuya, G.M. Pereira, A.; Gerwick, W.H.; Haines, T.H.; Vanderwal, C.D. *J. Am. Chem. Soc.* **2009**, *131*, 7570–7572.

warmed to 0 °C over 2.5 h and the reaction was quenched with saturated aqueous NH<sub>4</sub>Cl (3 mL). The reaction mixture was partitioned between EtOAc and water. The layers were separated and the aqueous layer extracted with pentane (3 x 20 mL). The combined extracts were washed with water (10 mL) and brine (10 mL) and dried with Na<sub>2</sub>SO<sub>4</sub>. After filtration and concentration, the residue was passed through a plug of SiO<sub>2</sub> to yield crude **19** (151 mg) as a 2:1 (*Z*:*E*) mixture of inseparable isomers (as measured by <sup>1</sup>H NMR analysis of the crude reaction mixture) which was used without further purification.

Allylic epoxide **19** (2:1 mix of *Z*:*E* diastereomers, 145 mg, 0.234 mmol) was dissolved in CH<sub>2</sub>Cl<sub>2</sub> (4 mL), Et<sub>4</sub>NCl (1.99 g, 12.0 mmol) was added and the mixture stirred until clear. BF<sub>3</sub>·OEt<sub>2</sub> (0.155 mL, 1.24 mmol) was added and the solution was stirred for 30 min at room temperature and quenched by pouring into water. After the layers were separated, the aqueous layer was extracted three times with CH<sub>2</sub>Cl<sub>2</sub> (3 x 10 mL). The combined organic extracts were washed with water and brine, dried over Na<sub>2</sub>SO<sub>4</sub>, filtered and concentrated. The residue was purified by column chromatography to yield **20** (65.8 mg, 0.100 mmol, 32%, two steps) R<sub>f</sub> = 0.35 (2:1 hexane:CH<sub>2</sub>Cl<sub>2</sub>); [α]<sub>D</sub><sup>24</sup> = +22.6 (c = 0.695, CH<sub>2</sub>Cl<sub>2</sub>); <sup>1</sup>H NMR (500 MHz, CD<sub>3</sub>OD) δ 5.79 (t, *J* = 10.3 Hz, 1H, H-12), 5.61 (dt, *J* = 10.8, 7.7 Hz, 1H, H-11), 5.32 (d, *J* = 10.0 Hz, H-10), 4.59 (ddd, *J* = 8.8, 5.2, 1.4 Hz, 1H, H-16), 4.18 (dd, *J* = 9.4, 1.4 Hz, 1H, H-15), 3.83 (d, *J* = 9.4 Hz, 1H, H-14), 2.22–2.19 (m, 4H, H-3, H-10), 1.98–1.92 (m, 1H, H-17), 1.86–1.79 (m, 1H, H-17), 1.61–1.51 (m, 3H), 1.47–1.29 (m, 23H) 0.93 (s, 9H, SiC(CH<sub>3</sub>)<sub>3</sub>), 0.91 (t, *J* = 6.8 Hz, 3H, H-24), 0.13 (s, 6H, Si(CH<sub>3</sub>)<sub>2</sub>); <sup>13</sup>C NMR (125 MHz, CDCl<sub>3</sub>) δ 135.6, 126.4, 93.7, 75.1, 72.3, 65.1, 61.7, 59.6, 43.7, 36.7, 32.1, 29.6, 29.5, 29.47, 29.41, 29.34, 29.278, 29.267, 29.245, 27.9, 26.8, 26.0 (3C), 25.0, 22.9, 18.5, 14.3, –5.1 (2C); IR 3482, 2928, 2857, 1458, 1257, 1119, 839, 779 cm<sup>-1</sup>; HRMS (ESI) *m/z* calcd for C<sub>30</sub>H<sub>57</sub>Cl<sub>5</sub>O<sub>2</sub>SiNa [M+Na]<sup>+</sup> 675.2468, found 675.2493.

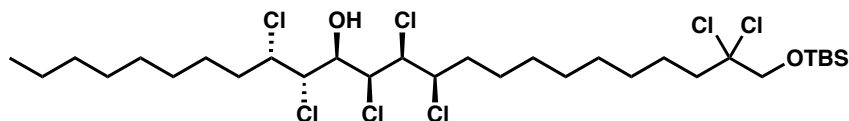

**(+)-(11*R*,12*S*,13*R*,14*S*,15*S*,16*S*)-1-(*tert*-Butyldimethylsilyloxy)-2,2,11,12,13,15,16-pentachlorotetra-cosan-14-ol (**21**):**

A solution of **20** (110 mg, 0.168 mmol) in CH<sub>2</sub>Cl<sub>2</sub> (1.6 mL) at –78 °C was treated with Et<sub>4</sub>NCl<sub>3</sub> (79.5 mg, 0.336 mmol). After 1.5 h, the flask was warmed to room temperature and quenched with a 1:1 solution of saturated aqueous NaHCO<sub>3</sub> and saturated aqueous Na<sub>2</sub>S<sub>2</sub>O<sub>3</sub> (1 mL). The mixture was diluted with water (5 mL) and CH<sub>2</sub>Cl<sub>2</sub> (5 mL), and the layers were separated. The aqueous layer was extracted with CH<sub>2</sub>Cl<sub>2</sub> (3 x 5 mL) and the combined organic extracts were dried with Na<sub>2</sub>SO<sub>4</sub>, filtered and concentrated. Purification via column chromatography (3:1 pentane:CH<sub>2</sub>Cl<sub>2</sub>) yielded **21** as a >8:1 mixture of diastereomers (117 mg, 97%): R<sub>f</sub> = 0.18 (3:1 hexanes:CH<sub>2</sub>Cl<sub>2</sub>); [α]<sub>D</sub><sup>24</sup> = +2.5 (c = 0.285, CH<sub>2</sub>Cl<sub>2</sub>); <sup>1</sup>H NMR (500 MHz, C<sub>6</sub>D<sub>6</sub>) δ 5.13 (d, *J* = 8.6, 1.1 Hz, 1H H-13), 4.52 (t, *J* = 9.2 Hz, 1H, H-14), 4.30 (ddd, *J* = 9.5, 2.3, 1.6 Hz, 1H, H-16), 4.19 (dd, *J* = 8.6 Hz, 2.2 Hz, 1H, H-12), 4.09 (ddd, *J* = 8.1, 5.7, 2.3 Hz, 1H, H-11), 3.95 (dd, *J* = 9.2, 1.6 Hz, 1H, H-15), 3.92 (s, 2H, H-1), 2.26–2.23 (m, 2H, H3), 1.94 (q, *J* = 9.9 Hz, 1H, H-17), 1.85–1.78 (m, 1H, H-10), 1.72–1.63 (m, 4H, OH, H-10, H-4), 1.51–1.43 (m, 2H, H-17), 1.35–1.00 (m, 20H), 0.931 (s, 9H, SiC(CH<sub>3</sub>)<sub>3</sub>), 0.926 (t, *J* = 7.1 Hz, 3H, H-24), 0.026 (s, 6H); <sup>13</sup>C NMR (125 MHz, C<sub>6</sub>D<sub>6</sub>) δ 94.3, 73.0, 72.4, 68.5, 68.4, 65.4, 62.1, 61.9, 44.4, 37.3, 36.9, 32.6, 30.1, 30.0, 29.9, 29.83, 29.77, 29.7, 29.6, 27.3, 26.8, 26.3, 25.6, 23.4, 18.8, 14.7, –5.0;

IR 2929, 2856, 1463, 1257, 1119  $\text{cm}^{-1}$ ; HRMS (ESI)  $m/z$  calcd for  $\text{C}_{30}\text{H}_{57}\text{Cl}_7\text{O}_2\text{SiNa}$   $[\text{M}+\text{Na}]^+$  745.1845, found 745.1839.

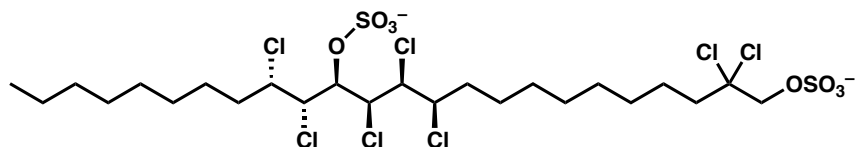

**(+)-(11R,12S,13S,14R,15S,16S)-2,2,11,12,13,15,16-heptachlorotetracosane-1,14-diyl disulfate (22):** Silyl ether **21** (21 mg, 0.029 mmol) was dissolved in dry  $\text{CH}_2\text{Cl}_2$  (1.45 mL, 0.02 M) and  $\text{ClSO}_3\text{H}$  (approx. 0.15 mL, 0.031 mmol) was added via Pasteur pipette. A brown color immediately resulted. After sitting for 10 min the solution was transferred via pipette into 10 mL of vigorously stirred saturated aqueous  $\text{NaHCO}_3$  with 500 mg of added solid  $\text{NaHCO}_3$ . The aqueous solution was concentrated and the solids extracted by stirring the solids for 10 min with *n*-butanol (4 mL) and then decanting and filtering the liquid through a cotton filter. After repeating this extraction three times, the *n*-butanol was evaporated to leave **22** as an off-white solid (20 mg, 0.024 mmol, 83%):  $R_f = 0.16$  (6:1  $\text{CH}_2\text{Cl}_2$ :MeOH);  $[\alpha]_D^{24} = +6.4$  ( $c = 0.50$ , MeOH);  $^1\text{H NMR}$  (600 MHz,  $\text{CD}_3\text{OD}$ , 330 K)  $\delta$  5.05 (dd,  $J = 9.1, 0.72$  Hz, 1H, H-14), 4.95 (ddd,  $J = 8.8, 4.3, 1.7$  Hz, 1H, H-11), 4.85 (dd,  $J = 9.9, 0.81$  Hz, 1H, H-13), 4.78 (ddd,  $J = 8.8, 5.4, 1.0$  Hz, 1H, H-16), 4.66 (dd,  $J = 9.9, 1.7$  Hz, 1H, H-12), 4.34 (s, 2H, H-1), 4.28 (dd,  $J = 9.1, 1.1$  Hz, 1H, H-15), 2.28–2.24 (m, 2H, H-3), 1.98–1.92 (m, 2H), 1.89–1.81 (m, 2H), 1.67–1.65 (m, 2H), 1.64–1.50 (m, 2H), 1.47–1.27 (m, 20H), 0.90 (t,  $J = 7.1$  Hz, 3H, H-24);  $^{13}\text{C NMR}$  (125 MHz,  $\text{CD}_3\text{OD}$ )  $\delta$  91.3, 77.6, 75.7, 69.2, 67.7, 66.2, 63.2, 62.2, 45.3, 38.6, 37.9, 33.2, 30.7, 30.6, 30.5, 30.47, 30.3, 30.24, 30.22, 27.8, 27.4, 26.0, 23.9, 14.6; HRMS (ESI)  $m/z$  calcd for  $\text{C}_{24}\text{H}_{41}\text{Cl}_7\text{O}_8\text{S}_2$   $[\text{M}]^{2-}$  383.0037, found 383.0052.

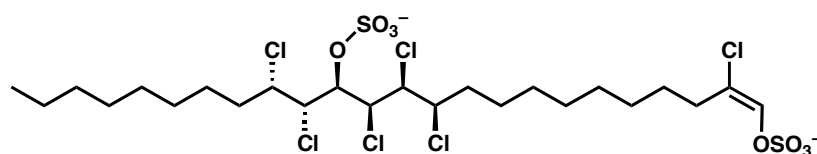

**(+)-(11R,12S,13S,14R,15S,16S,E)-2,11,12,13,15,16-hexachlorotetracos-1-ene-1,14-diyl disulfate (malhamensilipin A, 2):**

To a cold ( $-78^\circ\text{C}$ ) solution of **22** (9.4 mg, 0.012 mmol) in THF (0.96 mL, 0.012 M) was added LDA (0.14 mL, 0.37 M in THF, freshly prepared from newly distilled diisopropylamine and *n*-BuLi/hexanes) dropwise by syringe over 30 seconds. The solution was stirred at  $-78^\circ\text{C}$  for 75 min and saturated aqueous  $\text{NaHCO}_3$  (1.5 mL) was added. The solution was warmed to ambient temperature over 10 min and then concentrated. The solids were triturated with *n*BuOH (4 x 5 mL), and the combined extracts were filtered and concentrated to give a brown gum (5.2 mg). The crude product was purified by column chromatography (1. E. Merck HP silica, 1:2 MeCN: $\text{CH}_2\text{Cl}_2$ , then 2. E. Merck HP silica, 1:6 MeOH: $\text{CH}_2\text{Cl}_2$ ) to give a white gum (2.7 mg, ca. 90% purity, 26%):  $R_f = 0.16$  (6:1  $\text{CH}_2\text{Cl}_2$ :MeOH);  $[\alpha]_D^{24} = +7.0$  ( $c = 0.130$ , MeOH);  $^1\text{H NMR}$  (600 MHz,  $\text{CD}_3\text{OD}$ , 330 K)  $\delta$  6.73 (s, 1H), 5.04 (dd,  $J = 9.1, 0.72$  Hz, 1H), 4.95 (ddd,  $J = 8.8, 4.3, 1.7$  Hz, 1H), 4.84 (dd,  $J = 9.9, 0.81$  Hz, 1H), 4.79 (ddd,  $J = 8.8, 5.4, 1.0$  Hz, 1H), 4.65 (dd,  $J = 9.9, 1.7$  Hz, 1H), 4.28 (dd,  $J = 9.1, 1.1$  Hz, 1H), 2.43 (t,  $J = 6.1$ , 2H), 1.97–1.92 (m, 2H), 1.87–1.82 (m, 2H), 1.63–1.57 (m, 2H), 1.56–1.50 (m, 2H), 1.48–1.41 (m, 2H), 1.39–1.27 (m, 20H), 0.90 (t,  $J = 5.9$ , 3H);  $^{13}\text{C NMR}$   $\delta$  136.5, 125.4, 77.5, 69.2,



67.7, 66.2, 63.4, 62.2., 38.6, 37.9, 33.2, 32.0, 30.71, 30.69, 30.66, 30.5 (2 C), 30.2, 30.0, 28.0, 27.8, 27.5, 23.9, 14.6; HRMS (ESI)  $m/z$  calcd for  $C_{24}H_{40}Cl_6O_8S_2$   $[M]^{2-}$  365.0154, found 365.0143.

### III. Dichlorination Diastereoselectivity for Derivatives of Diol **S3**

Diol **S3** (the methyl ester corresponding to **14**—our early studies toward malhamensilipin A were performed with methyl esters) and three derivatives were evaluated for the diastereoselectivity of dichlorination of the alkene. Analysis of the crude reaction mixture of the dichlorination of **S3** revealed a 1:1 mixture of diastereomers; these products were never separated. This selectivity is perfectly consistent with that previously observed and reported by us for *Z*-allylic alcohol dichlorinations under these conditions.<sup>5</sup> The allylic trichloroacetate derivative **S5** was dichlorinated with high *syn*-selectivity (10:1) in accord with our previous studies.<sup>5</sup> The identity of **S6-syn** was verified by conversion to a diastereomer of **21**, whose relative configuration was secured by *J*-based configurational analysis. Dichlorination of nosyl ester **S7** demonstrated essentially complete selectivity in the formation of **S8-anti**, in line with the conversion of **15** to **16** described in detail in this disclosure. Finally, **S9** delivered the *syn*-product with marginal selectivity. Conversion of products **S6** into **S10** by nosylation and **S8** into **S10** by trichloroacetylation showed that all assignments were self-consistent. In all cases, NMR spectra of the crude reaction mixtures demonstrated clean reactivity. Complete details are forthcoming in a full paper.

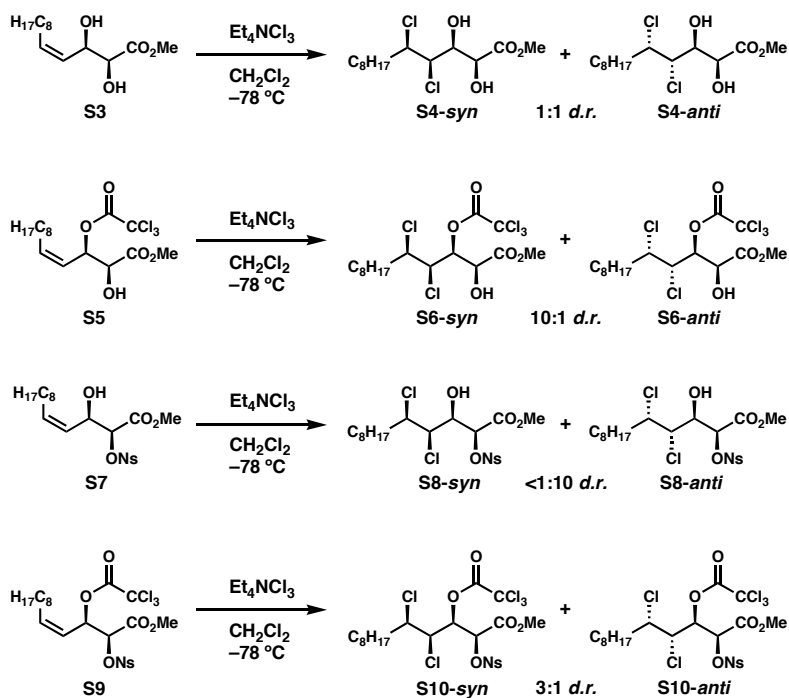

5) Shibuya, G. M.; Kanady, J. S.; Vanderwal, C. D. *J. Am. Chem. Soc.* **2008**, *130*, 12514–12518.

## IV. NMR Spectra

<sup>1</sup>H spectrum

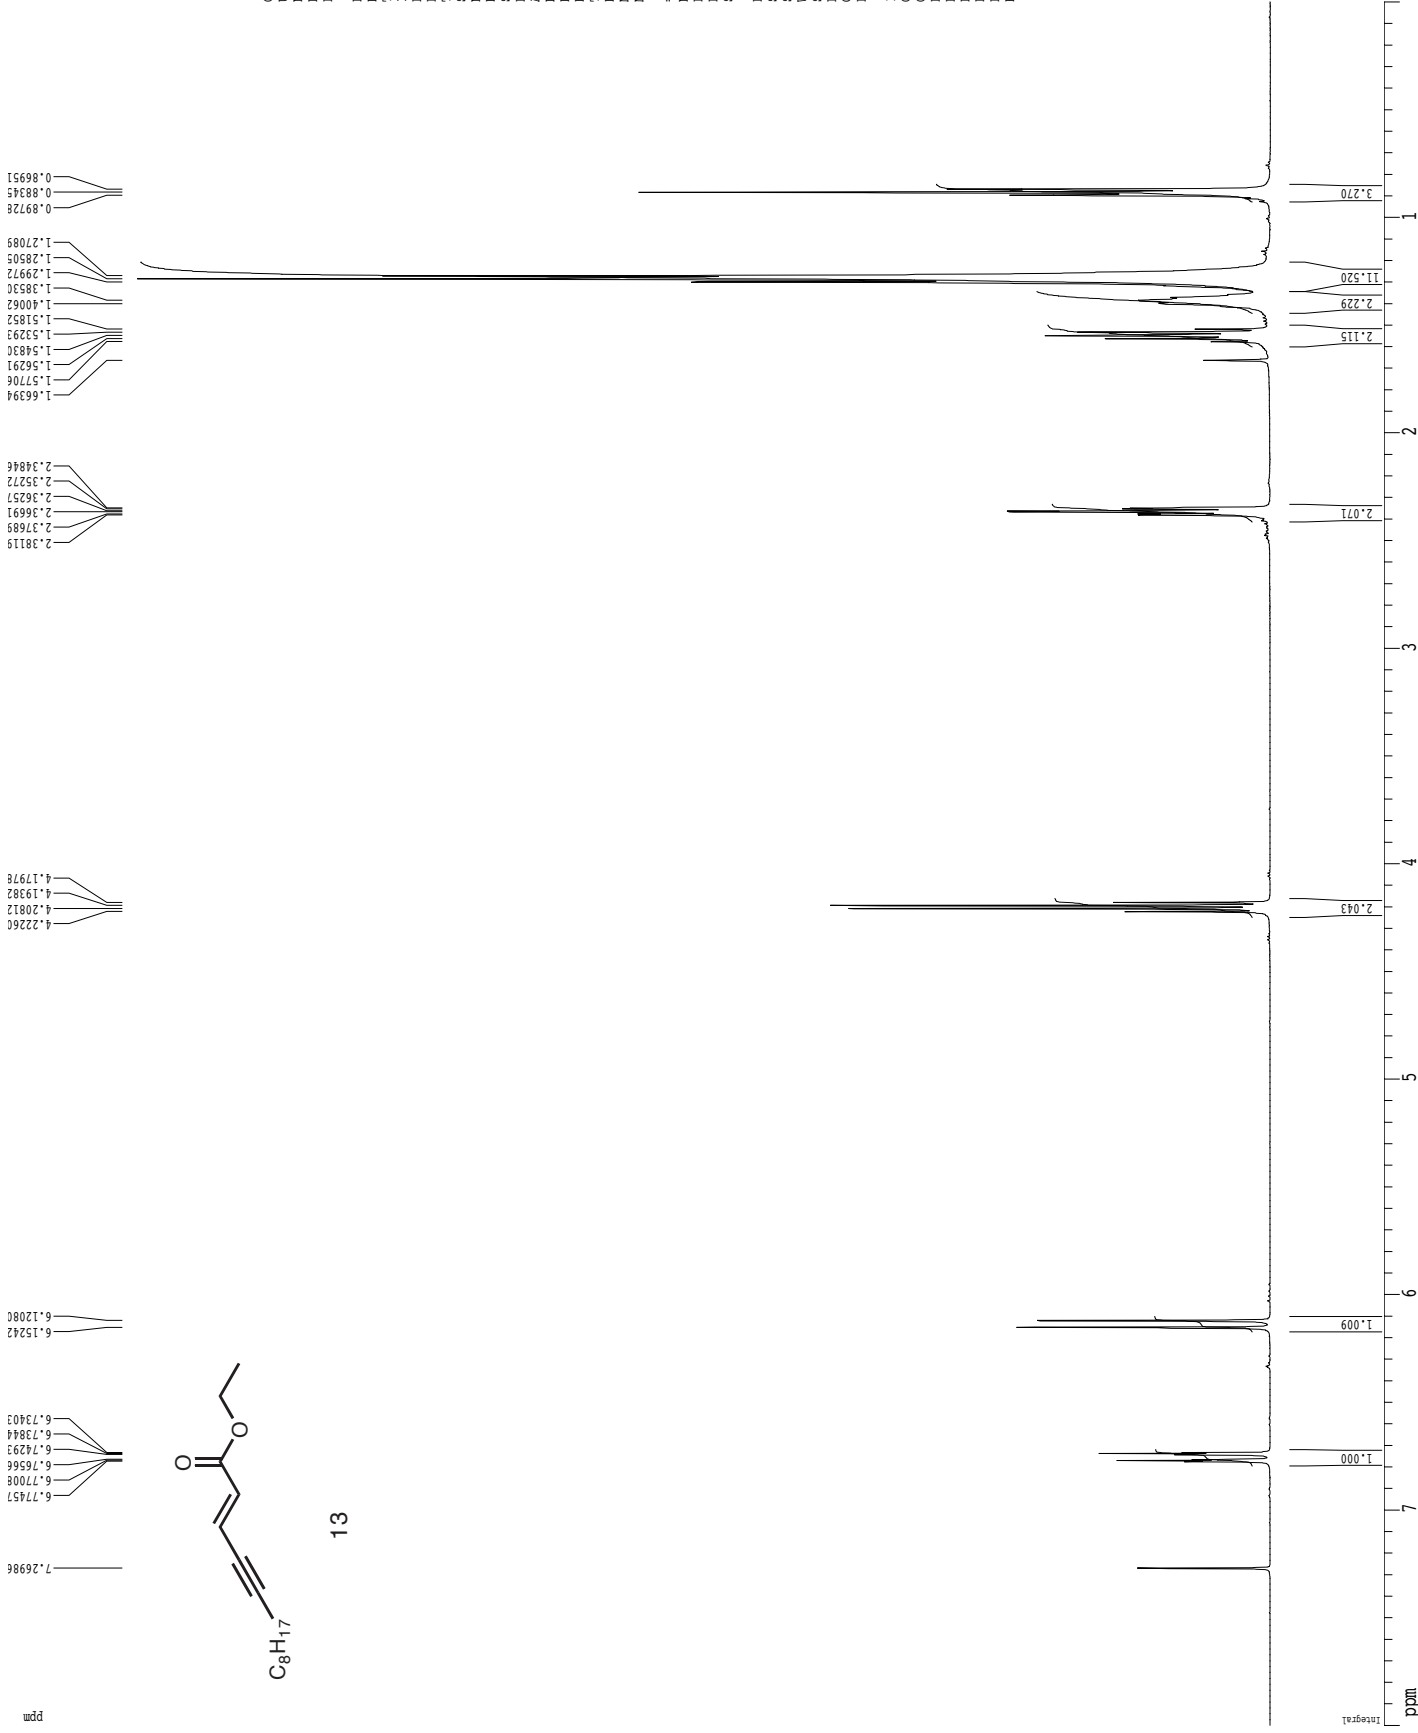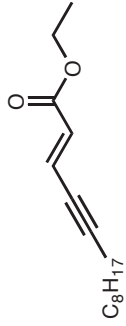

13

Current Data Parameters  
 USER dbedke  
 NAME DBA-3-enyster  
 EXPNO 1  
 PROCNO 1

F2 - Acquisition Parameters  
 Date\_ 20091104  
 Time 15.05  
 INSTRUM cryo500  
 PROBDI 5 mm CPCLP1-H-  
 PULPROG zgpg30  
 O1PRG zgpg30  
 SOLVENT CDCl3  
 NS 8  
 DS 2  
 SWH 8012.820 Hz  
 FIDRES 0.098043 Hz  
 AQ 5.0998774 sec  
 RG 5  
 DW 62.400 usec  
 DE 6.00 usec  
 TE 298.0 K  
 D1 0.10000000 sec  
 ACRESF 0.00000000 sec  
 ACWR 0.01000000 sec

==== CHANNEL f1 =====  
 NUCL1 1H  
 P1 7.50 usec  
 PL1 1.60 dB  
 SFO1 500.2235015 MHz

F2 - Processing parameters  
 SI 65536  
 SF 500.2200262 MHz  
 WDW EN  
 SSB 0  
 LB 0.20 Hz  
 GB 0  
 PC 4.00

ID NMR plot parameters  
 CX 22.80 cm  
 CY 15.00 cm  
 F1P 8.000 ppm  
 F1 4001.76 Hz  
 F2P 0.000 ppm  
 F2 0.00 Hz  
 PPMCM 0.35088 ppm/cm  
 HZCM 175.51581 Hz/cm

<sup>1</sup>H spectrum

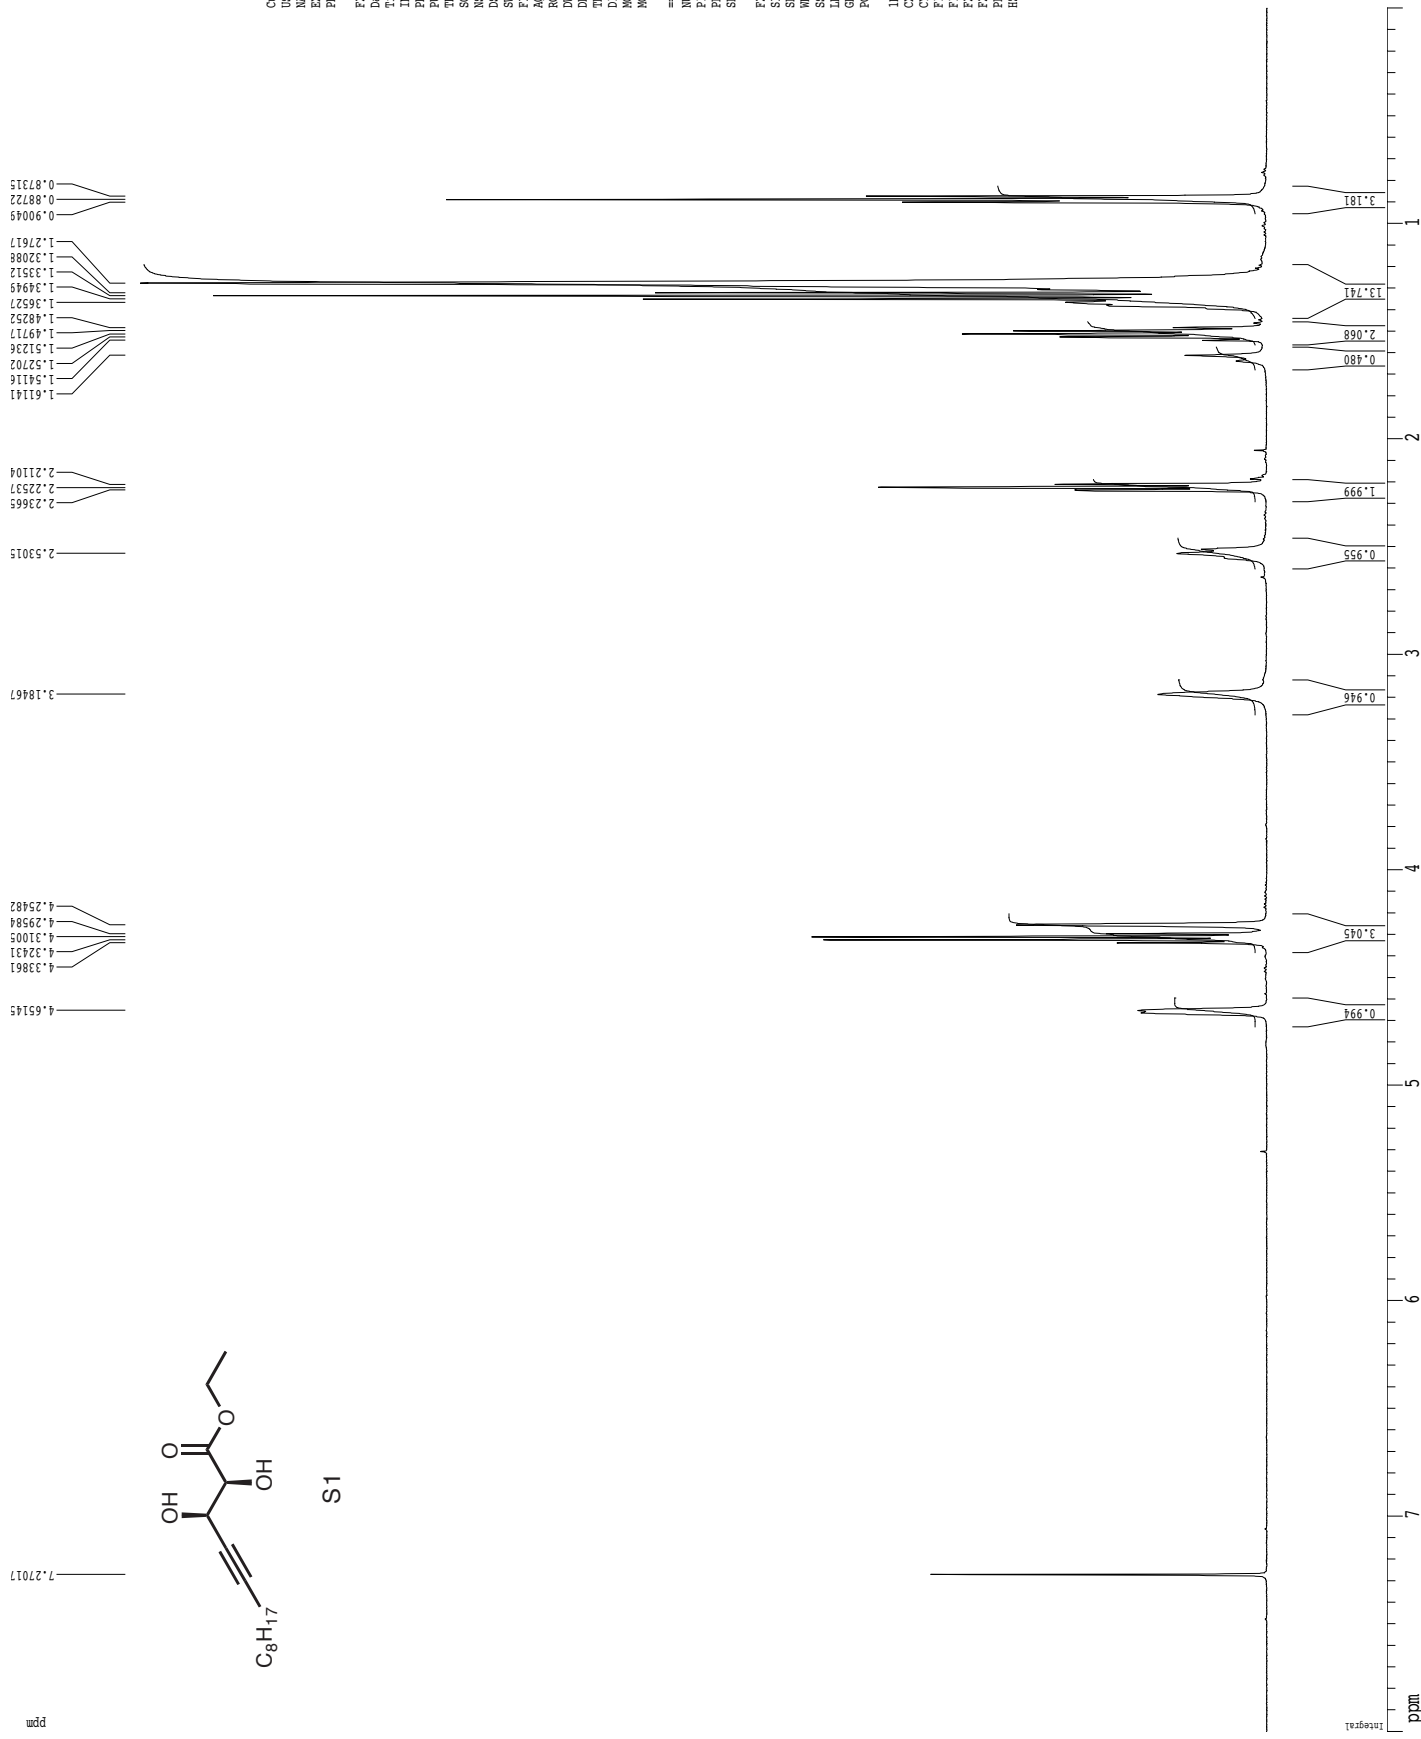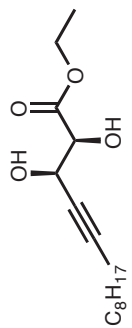

S1

Current Data Parameters  
 USER dbedke  
 NAME DKB.3.188  
 EXPNO 1  
 PROCNO 1

F2 - Acquisition Parameters  
 Date\_ 20091012  
 Time 7.45  
 INSTRUM cryo500  
 PROBD 5 mm CPCLP1H-  
 PULPROG zgpg30  
 SOLVENT CDCl3  
 NS 8  
 DS 2  
 SWH 8012.820 Hz  
 FIDRES 0.098043 Hz  
 AQ 5.0998774 sec  
 RG 5.7  
 DW 62.400 usec  
 DE 6.00 usec  
 TE 298.0 K  
 D1 0.1000000 sec  
 ACRESF 0.0000000 sec  
 ACPRR 0.0100000 sec

==== CHANNEL f1 =====  
 NUCL1 1H  
 P1 7.50 usec  
 PL1 1.60 dB  
 SFO1 500.2235015 MHz

F2 - Processing parameters  
 SI 65536  
 SF 500.2200261 MHz  
 WDW EN  
 SSB 0  
 LB 0.20 Hz  
 GB EN  
 PC 4.00

ID NMR plot parameters  
 CX 22.80 cm  
 CY 15.00 cm  
 FIP 8.000 ppm  
 F1 4001.76 Hz  
 F2P 0.000 ppm  
 F2 0.00 Hz  
 PPMCM 0.35088 ppm/cm  
 HZCM 175.51581 Hz/cm

1H spectrum

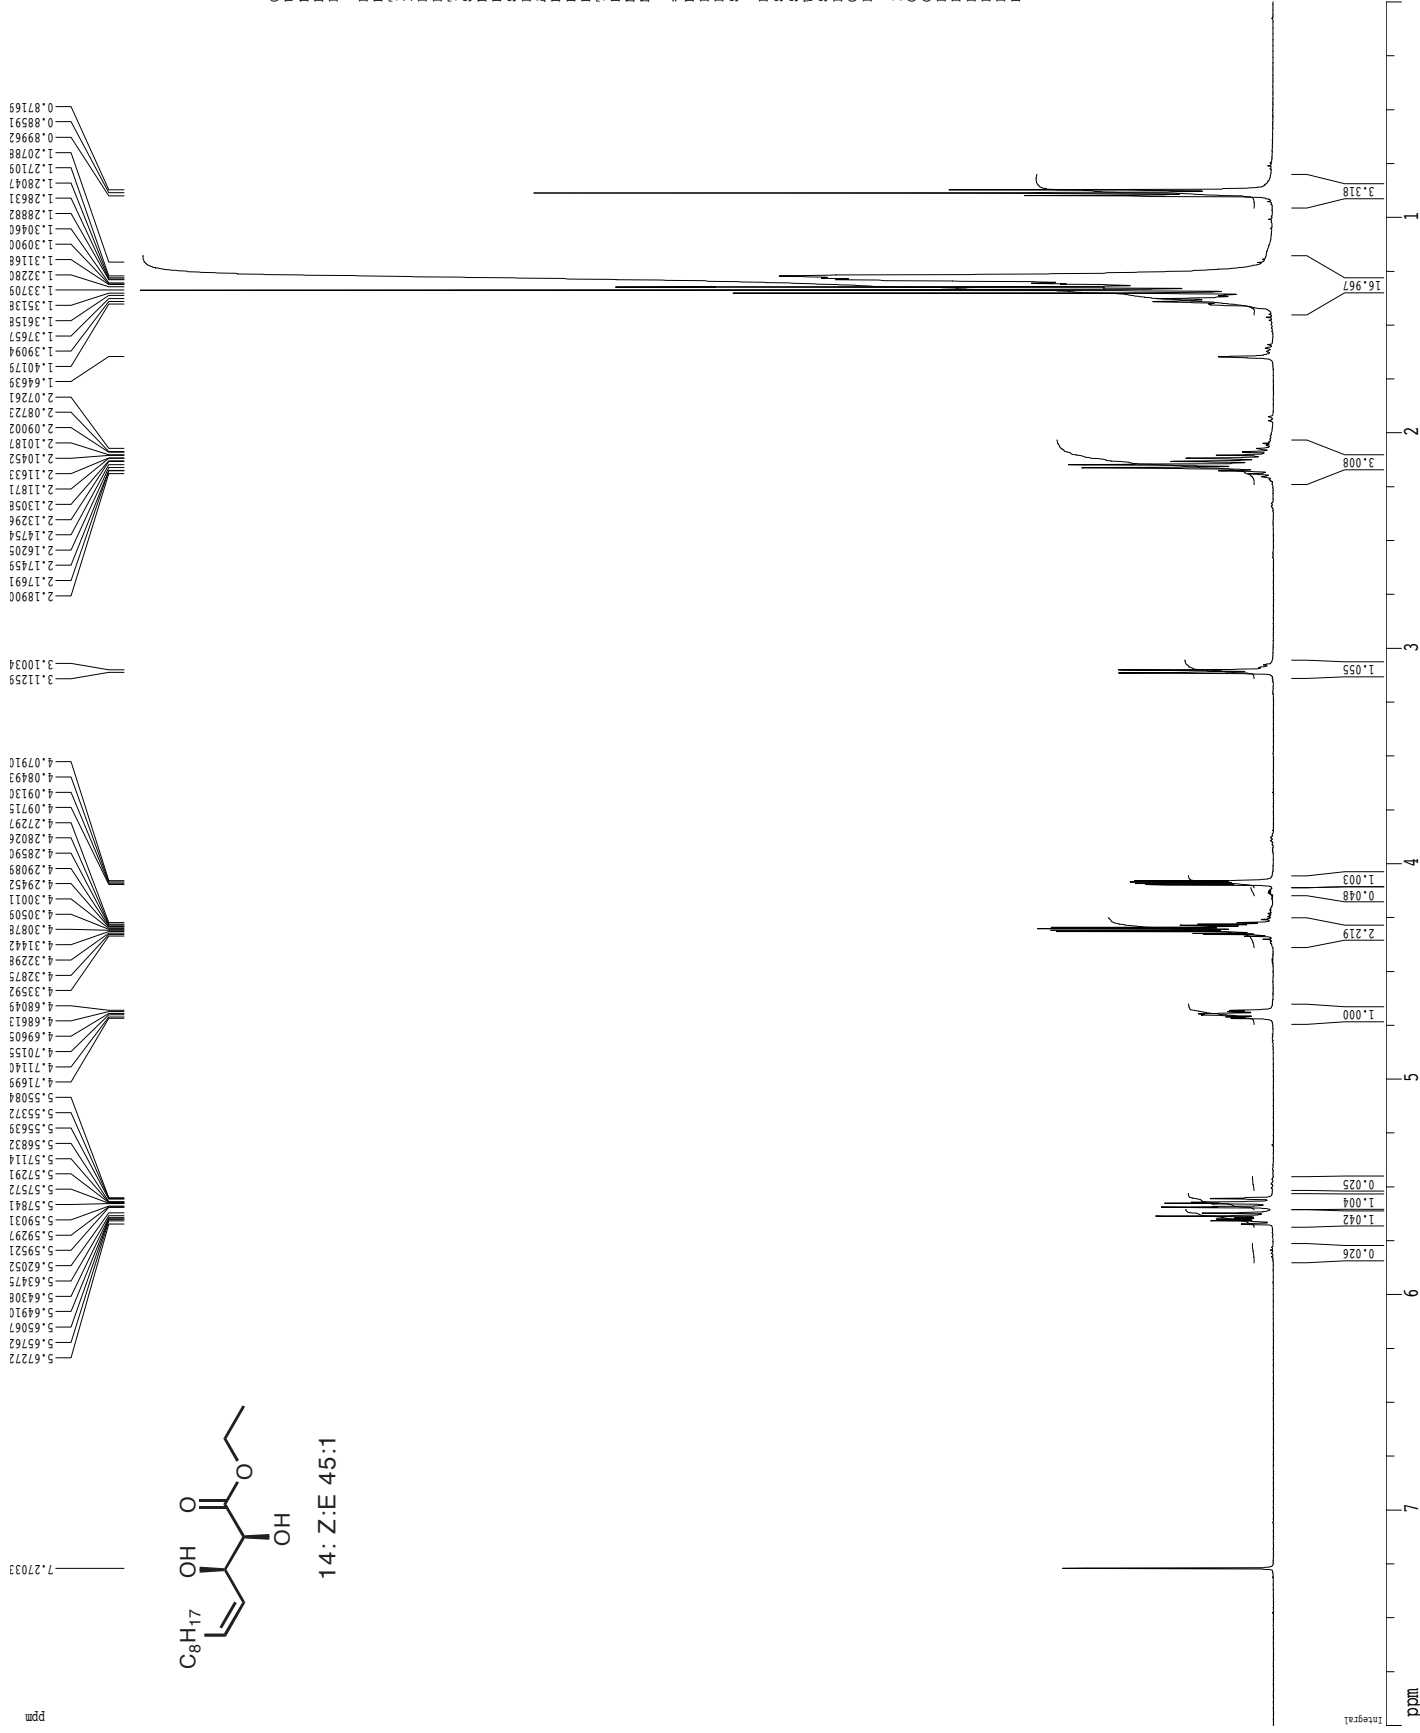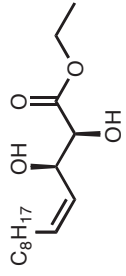

14: Z:E 45:1

Current Data Parameters  
 Name: 45454  
 Date: 20091012  
 Time: 20.20  
 INSTRUM: g500  
 PROBED: 5 mm broadband  
 PULPROG: zg30  
 TD: 81728  
 SOLVENT: CDCl3  
 NS: 9  
 DS: 4  
 SWH: 8012.820 Hz  
 FIDRES: 0.098043 Hz  
 AQ: 5.0998774 sec  
 RG: 101.6  
 DW: 62.400 usec  
 DE: 6.00 usec  
 TE: 298.0 K  
 D1: 0.10000000 sec  
 MCREST: 0.00000000 sec  
 MCPRK: 0.01500000 sec

===== CHANNEL f1 =====  
 NUCL1: 1H  
 P1: 12.00 usec  
 PL1: 0.00 dB  
 SFO1: 499.6234973 MHz

F2 - Processing parameters  
 SI: 65536  
 SF: 499.6200238 MHz  
 WDW: EM  
 SSB: 0  
 LB: 0.30 Hz  
 GB: 0  
 PC: 1.00

ID: NMR plot parameters  
 X: 22.80 cm  
 Y: 15.00 cm  
 Z: 8.00000000 um  
 F1: 3996.96 Hz  
 F2: 0.00000000 um  
 F3: 0.00 Hz  
 PPMCM: 0.35088 ppm/cm  
 HZCM: 175.30528 Hz/cm

**<sup>1</sup>H spectrum**

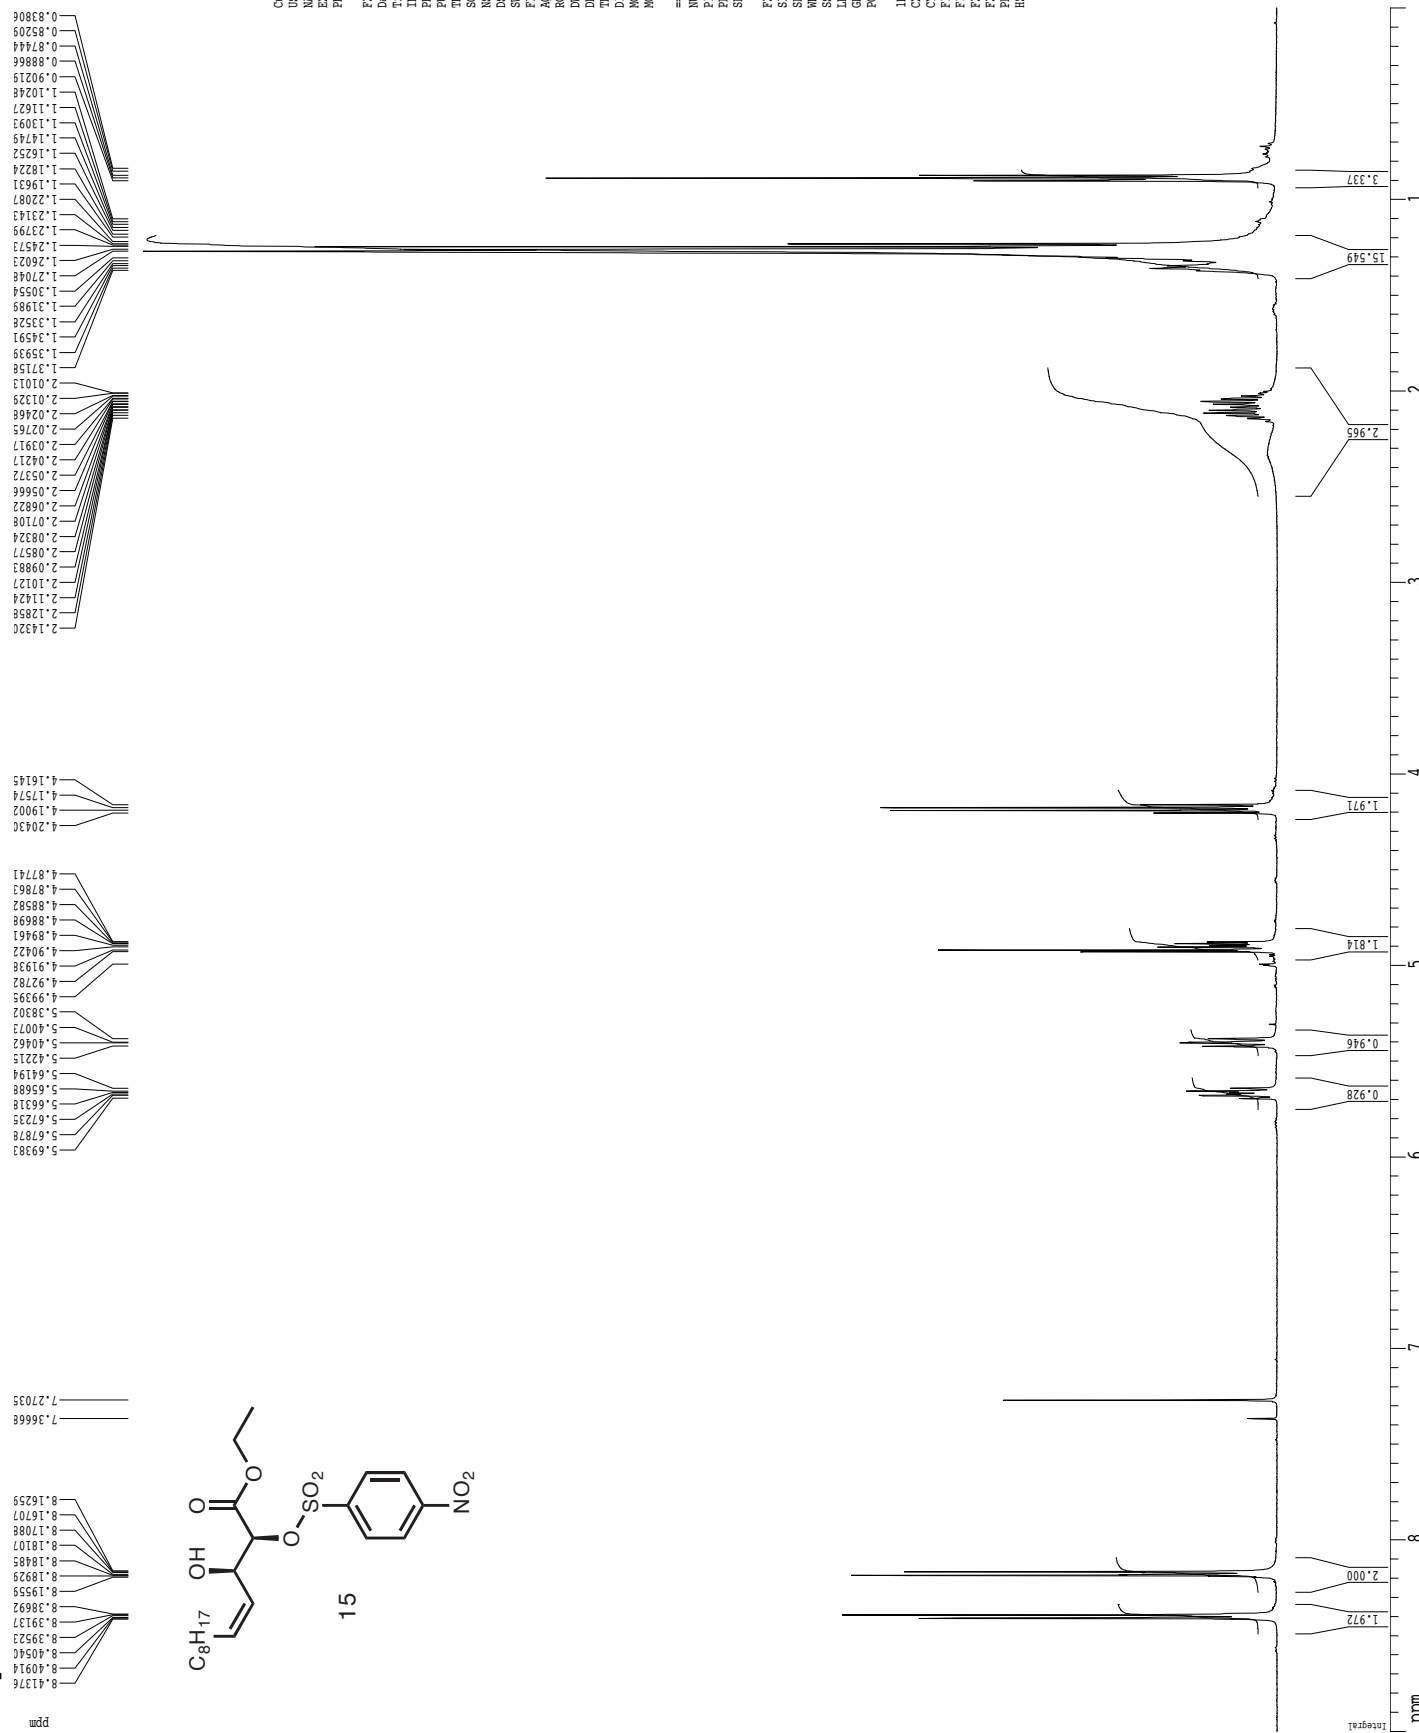

Current Data Parameters  
 NMR Date  
 NMR Name DMS-3.192CCL13-2  
 EXNO 1  
 PROCNO 1

F2 - Acquisition Parameters  
 Date 2/09/11  
 Time 13.55  
 INSTRUM gn500  
 PROBED 5 mm broadband  
 PULPROG zg30  
 TD 81728  
 SOLVENT CDCl3  
 NS 9  
 SH 8012.820 Hz  
 FIDRES 0.098043 Hz  
 AQ 5.0998774 sec  
 RG 128  
 DW 62.400 usec  
 DE 6.00 usec  
 TE 298.0 K  
 D1 0.10000000 sec  
 MCREST 0.00000000 sec  
 MCPRK 0.01500000 sec

==== CHANNEL f1 =====  
 NUCL1 <sup>1</sup>H  
 P1 12.00 usec  
 PL1 0.00 dB  
 PR1 -3.00 dB  
 SFO1 499.6234973 MHz

F2 - Processing parameters  
 SI 65536  
 SF 499.6200237 MHz  
 WDW EM  
 SSB 0  
 LB 0.30 Hz  
 GB 0  
 PC 1.00

ID NMR plot parameters  
 CX 22.50 cm  
 CY 15.00 cm  
 CZ 9.00000000 cm  
 EI 4496.58 Hz  
 E2 0.00000000 cm  
 F2 0.00 Hz  
 PPMCM 0.39474 ppm/cm  
 HZCM 197.21844 Hz/cm

**<sup>1</sup>H spectrum**

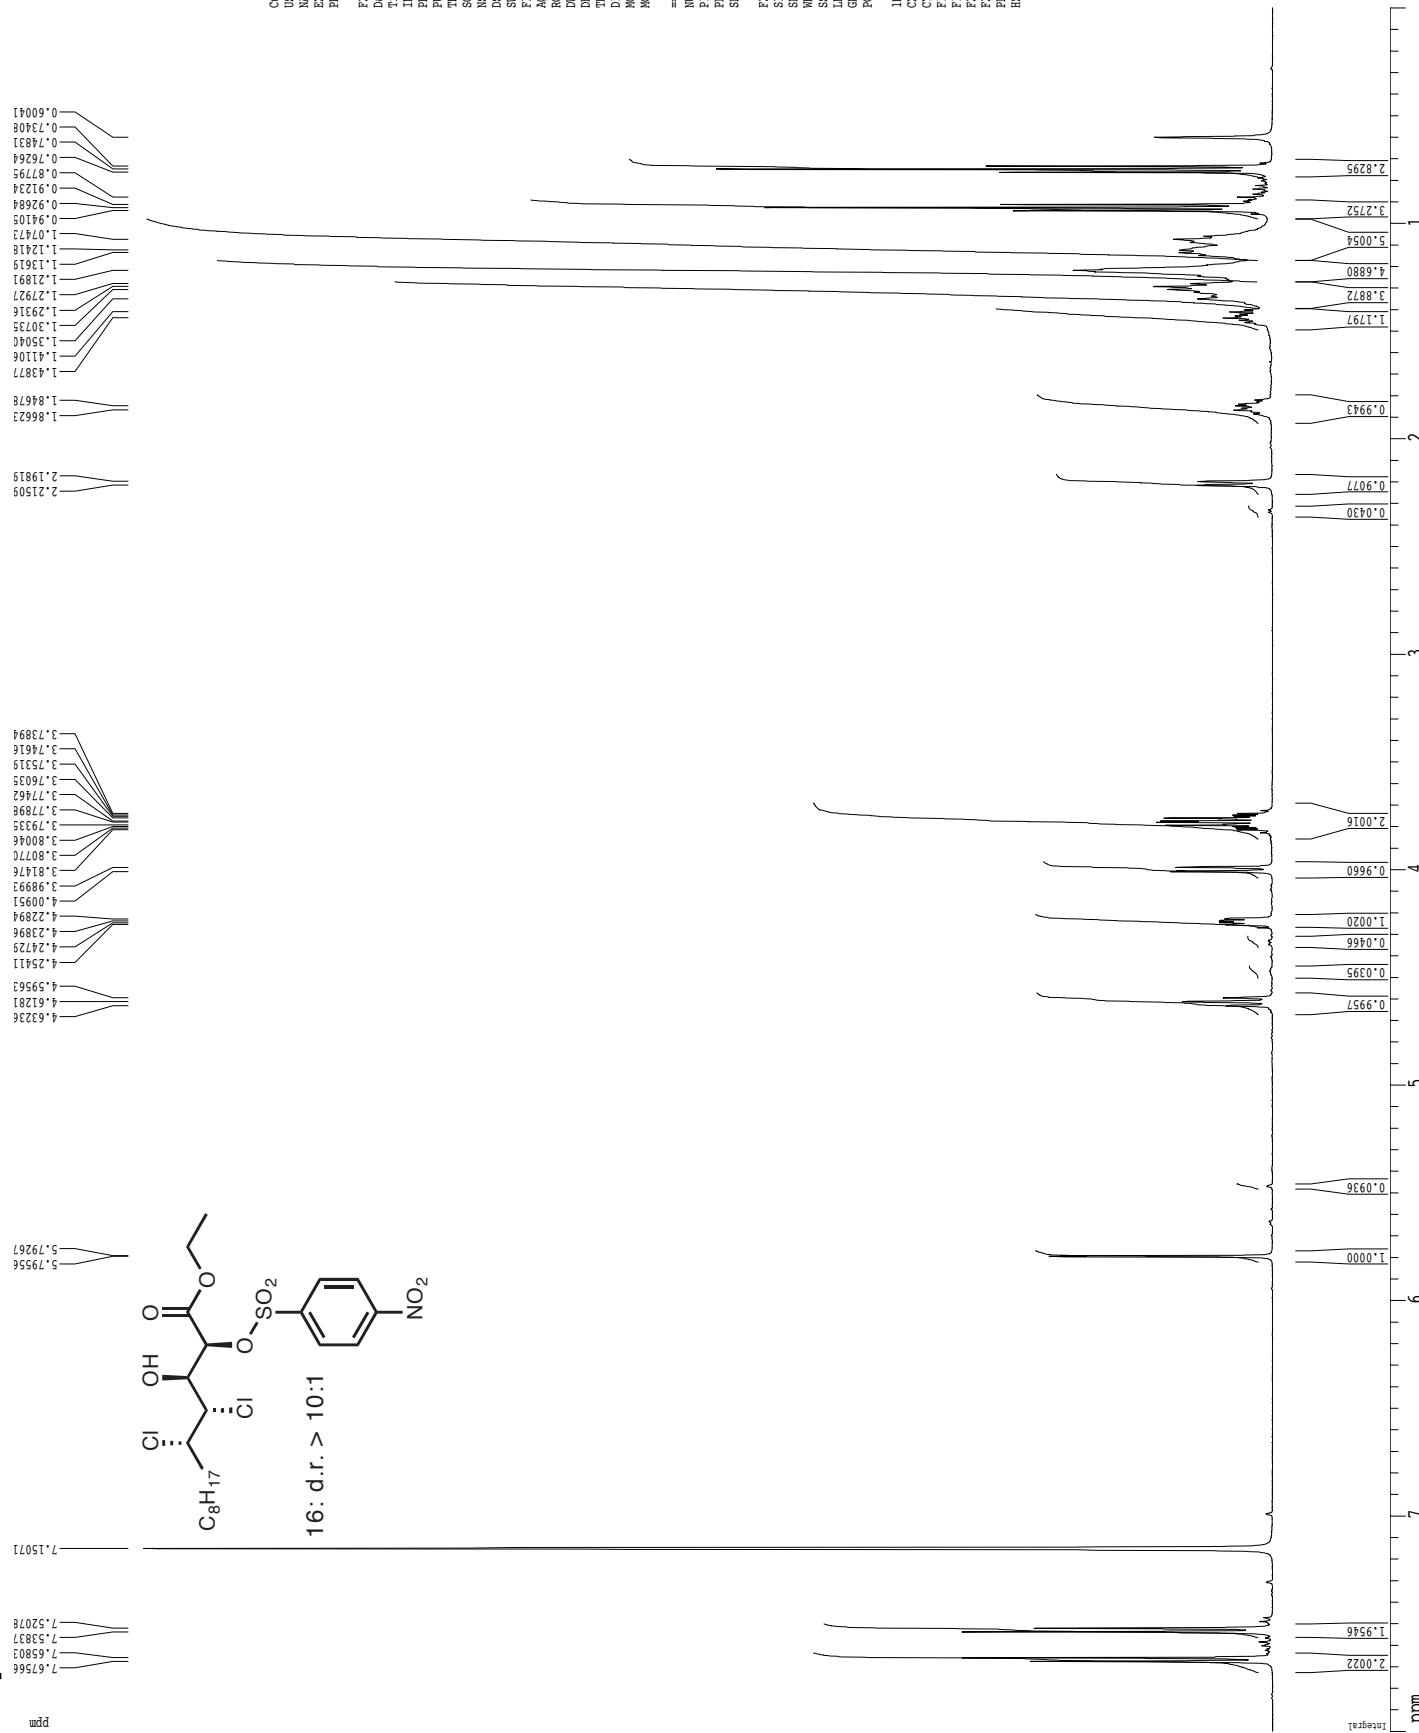

Current Data Parameters  
 USER dbedke  
 NAME DRB.3.193-2C6D6  
 EXPNO 1  
 PROCNO 1

F2 - Acquisition Parameters  
 Date\_ 20091104  
 Time 8.08  
 INSTRUM cryo500  
 PROBD 5 mm CPCL1 IH-  
 PULPROG zgpg30  
 SOLVENT CDCl3  
 NS 8  
 DS 2  
 SWH 8012.820 Hz  
 FIDRES 0.098043 Hz  
 AQ 5.0998774 sec  
 RG 8  
 DW 62.400 usec  
 DE 6.00 usec  
 TE 298.0 K  
 D1 0.10000000 sec  
 ACRESF 0.00000000 sec  
 ACPRK 0.01500000 sec

==== CHANNEL f1 =====  
 NUCL1 1H  
 P1 7.50 usec  
 PL1 1.60 dB  
 SFO1 500.2235015 MHz

F2 - Processing parameters  
 SI 65536  
 SF 500.2200596 MHz  
 WDW EN  
 SSB 0  
 LB 0.20 Hz  
 GB 0  
 PC 4.00

ID NMR plot parameters  
 CX 22.80 cm  
 CY 15.00 cm  
 F1P 8.000 ppm  
 F1 4001.76 Hz  
 F2P 0.000 ppm  
 F2 0.00 Hz  
 PPMCM 0.35088 ppm/cm  
 HZCM 175.51582 Hz/cm

<sup>1</sup>H spectrum

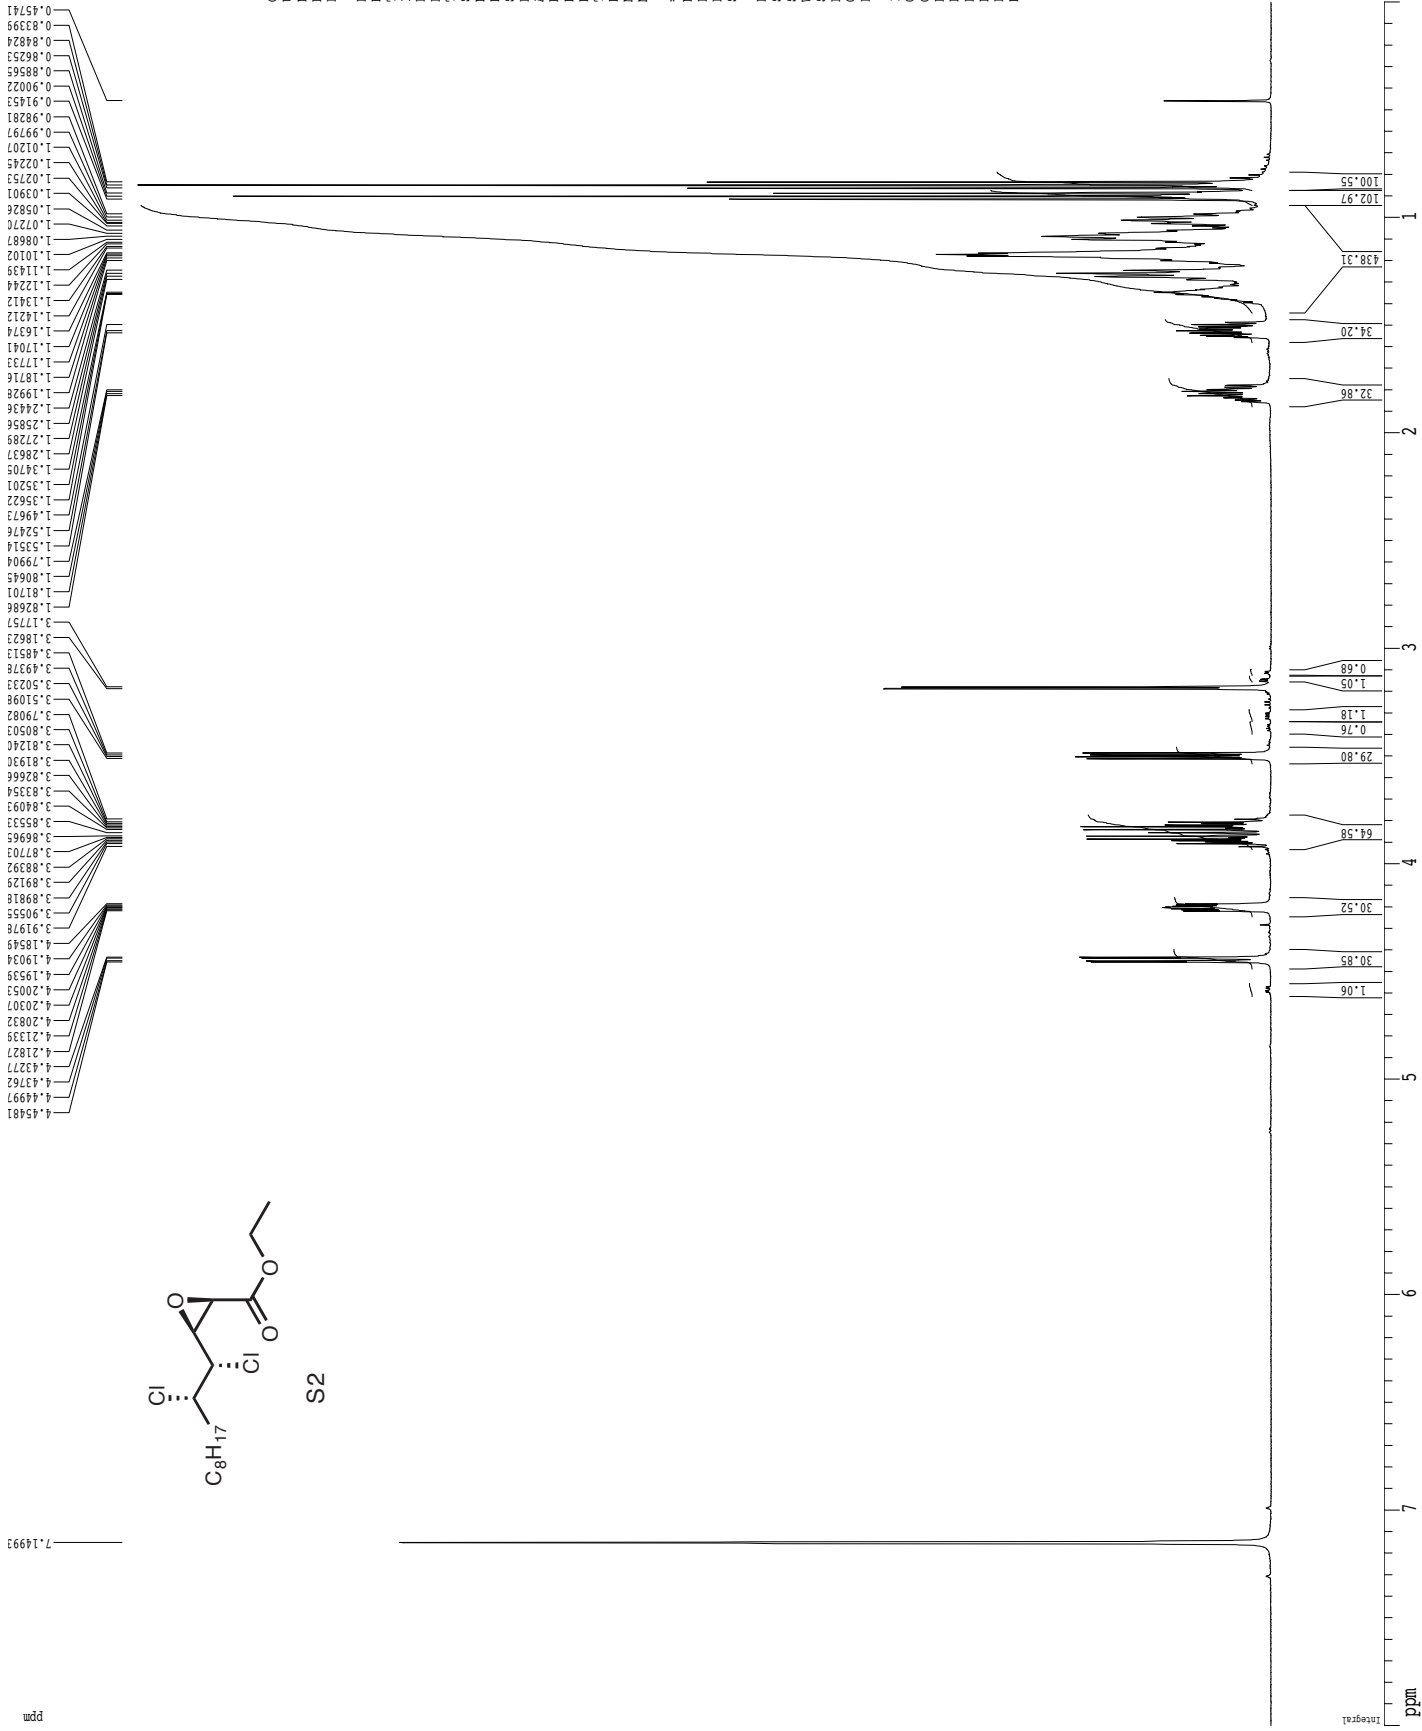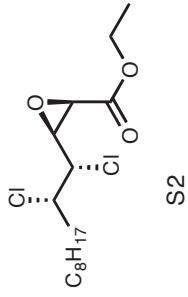

Current Data Parameters  
 Name: 300000000-2  
 Date: 20091210  
 Time: 12.19  
 INSTRUM: gn500  
 PROBEHD: 5 mm broadband  
 PULPROG: zg30  
 TD: 81728  
 SOLVENT: CDCl3  
 NS: 9  
 DS: 4  
 SWH: 8012.820 Hz  
 FIDRES: 0.098043 Hz  
 AQ: 5.0998774 sec  
 RG: 114  
 DW: 62.400 usec  
 DE: 6.00 usec  
 TE: 298.0 K  
 D1: 0.10000000 sec  
 MCREST: 0.00000000 sec  
 MCPRK: 0.01500000 sec

==== CHANNEL f1 =====  
 NUCL1: 1H  
 P1: 12.00 usec  
 PL1: 0.00 dB  
 PL2: -3.00 dB  
 SFO1: 499.6234973 MHz

F2 - Processing parameters  
 SI: 65536  
 SF: 499.620027 MHz  
 WDW: EM  
 SSB: 0  
 LB: 0.30 Hz  
 GB: 0  
 PC: 1.00

ID: NMR plot parameters  
 X: 22.80 cm  
 Y: 15.00 cm  
 Z: 15.00 cm  
 F1: 8.000 ppm  
 F2: 3996.96 Hz  
 F3: 0.000 ppm  
 F4: 0.00 Hz  
 PPMCM: 0.35088 ppm/cm  
 HZCM: 175.30527 Hz/cm

4.45481  
4.44997  
4.43762  
4.43277  
4.21827  
4.21335  
4.20832  
4.20307  
4.20053  
4.19539  
4.19034  
4.18549  
3.91978  
3.90555  
3.89818  
3.89129  
3.88392  
3.87703  
3.86965  
3.85533  
3.84093  
3.83354  
3.82666  
3.81930  
3.81240  
3.80503  
3.79822  
3.51098  
3.50233  
3.49378  
3.48513  
3.18623  
3.17757  
1.82686  
1.81701  
1.80645  
1.79904  
1.53514  
1.52476  
1.49673  
1.35622  
1.35201  
1.34705  
1.28637  
1.27289  
1.25856  
1.24436  
1.19286  
1.18716  
1.17733  
1.17041  
1.16374  
1.14212  
1.13412  
1.12244  
1.11439  
1.10102  
1.08687  
1.07270  
1.05826  
1.03901  
1.02753  
1.02245  
1.01207  
0.99797  
0.98281  
0.91453  
0.90022  
0.85855  
0.82823  
0.81824  
0.80395  
0.45741



**1H spectrum**

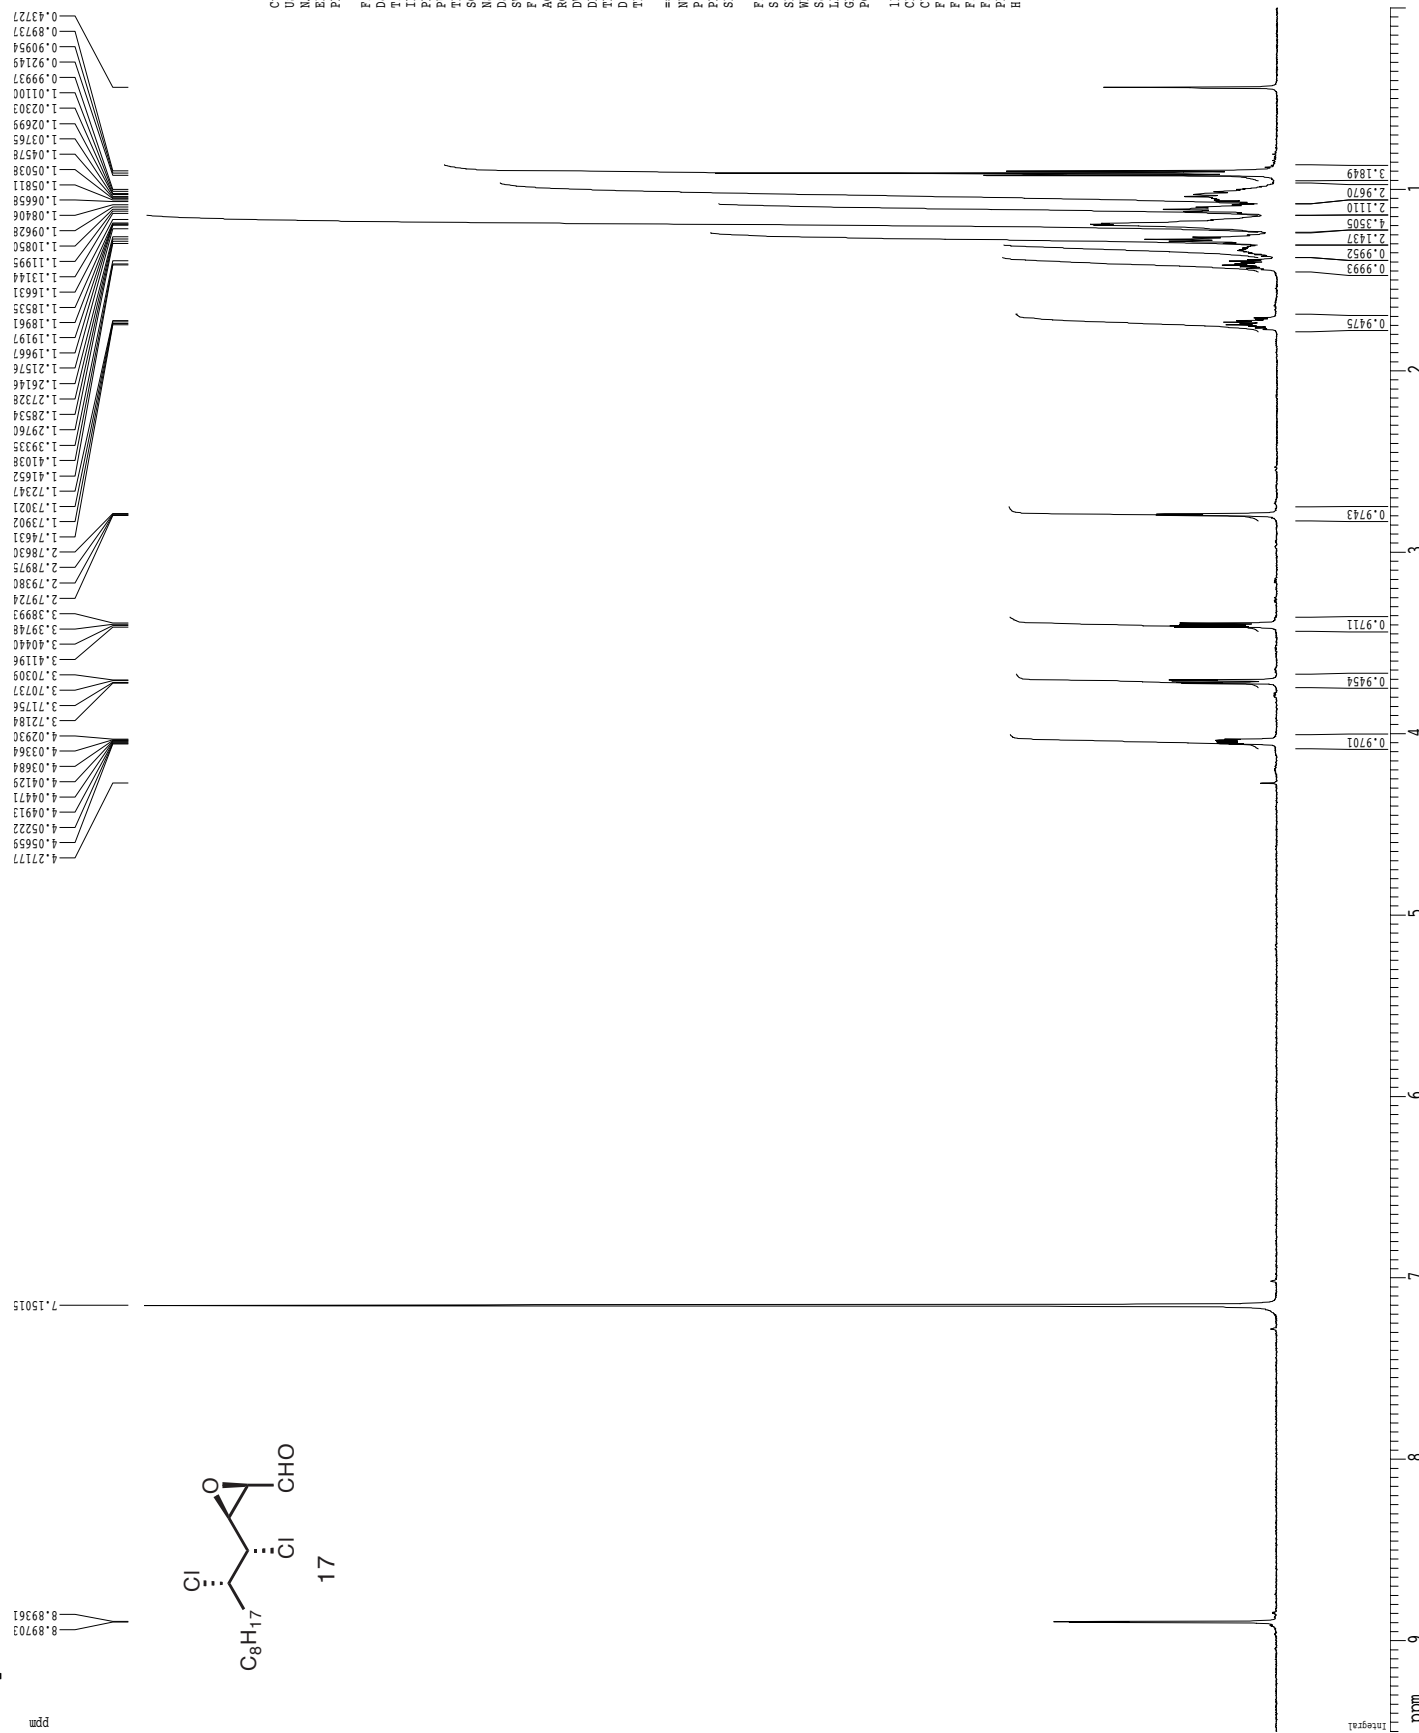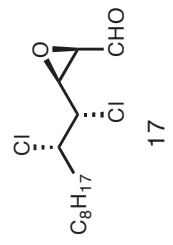

Current Data Parameters  
 USER dbedke  
 NAME DMB-3-173606  
 EXNO 1  
 PROCNO 1  
 F2 - Acquisition Parameters  
 Date 20090925  
 Time 11.43  
 INSTRUM av600  
 PROBHD 5 mm TBI IH/13  
 PULPROG zg30  
 TD 9798  
 SOLVENT CDCl<sub>3</sub>  
 NS 8  
 DS 8  
 AS 9615.385 Hz  
 FIDRES 0.048198 Hz  
 AQ 5.6928259 sec  
 RG 1280  
 DW 52.000 usec  
 DE 6.00 usec  
 TE 298.0 K  
 D1 0.10000000 sec  
 TD0 1  
 ===== CHANNEL f1 =====  
 NUC1 1H  
 P1 8.00 usec  
 PL1 -1.00 dB  
 SFO1 600.1342009 MHz  
 F2 - Processing parameters  
 SI 6536  
 SF 600.1300693 MHz  
 FID 1  
 SSB 0  
 LB 0.30 Hz  
 GB 0  
 PC 1.00  
 ID NMR plot parameters  
 CX 22.80 cm  
 CY 15.00 cm  
 FIP 9.500 ppm  
 F1 5701.24 Hz  
 F2P 0.000 ppm  
 F2 0.00 Hz  
 PPMCM 0.41667 ppm/cm  
 HZCM 250.05420 Hz/cm

**<sup>1</sup>H spectrum**

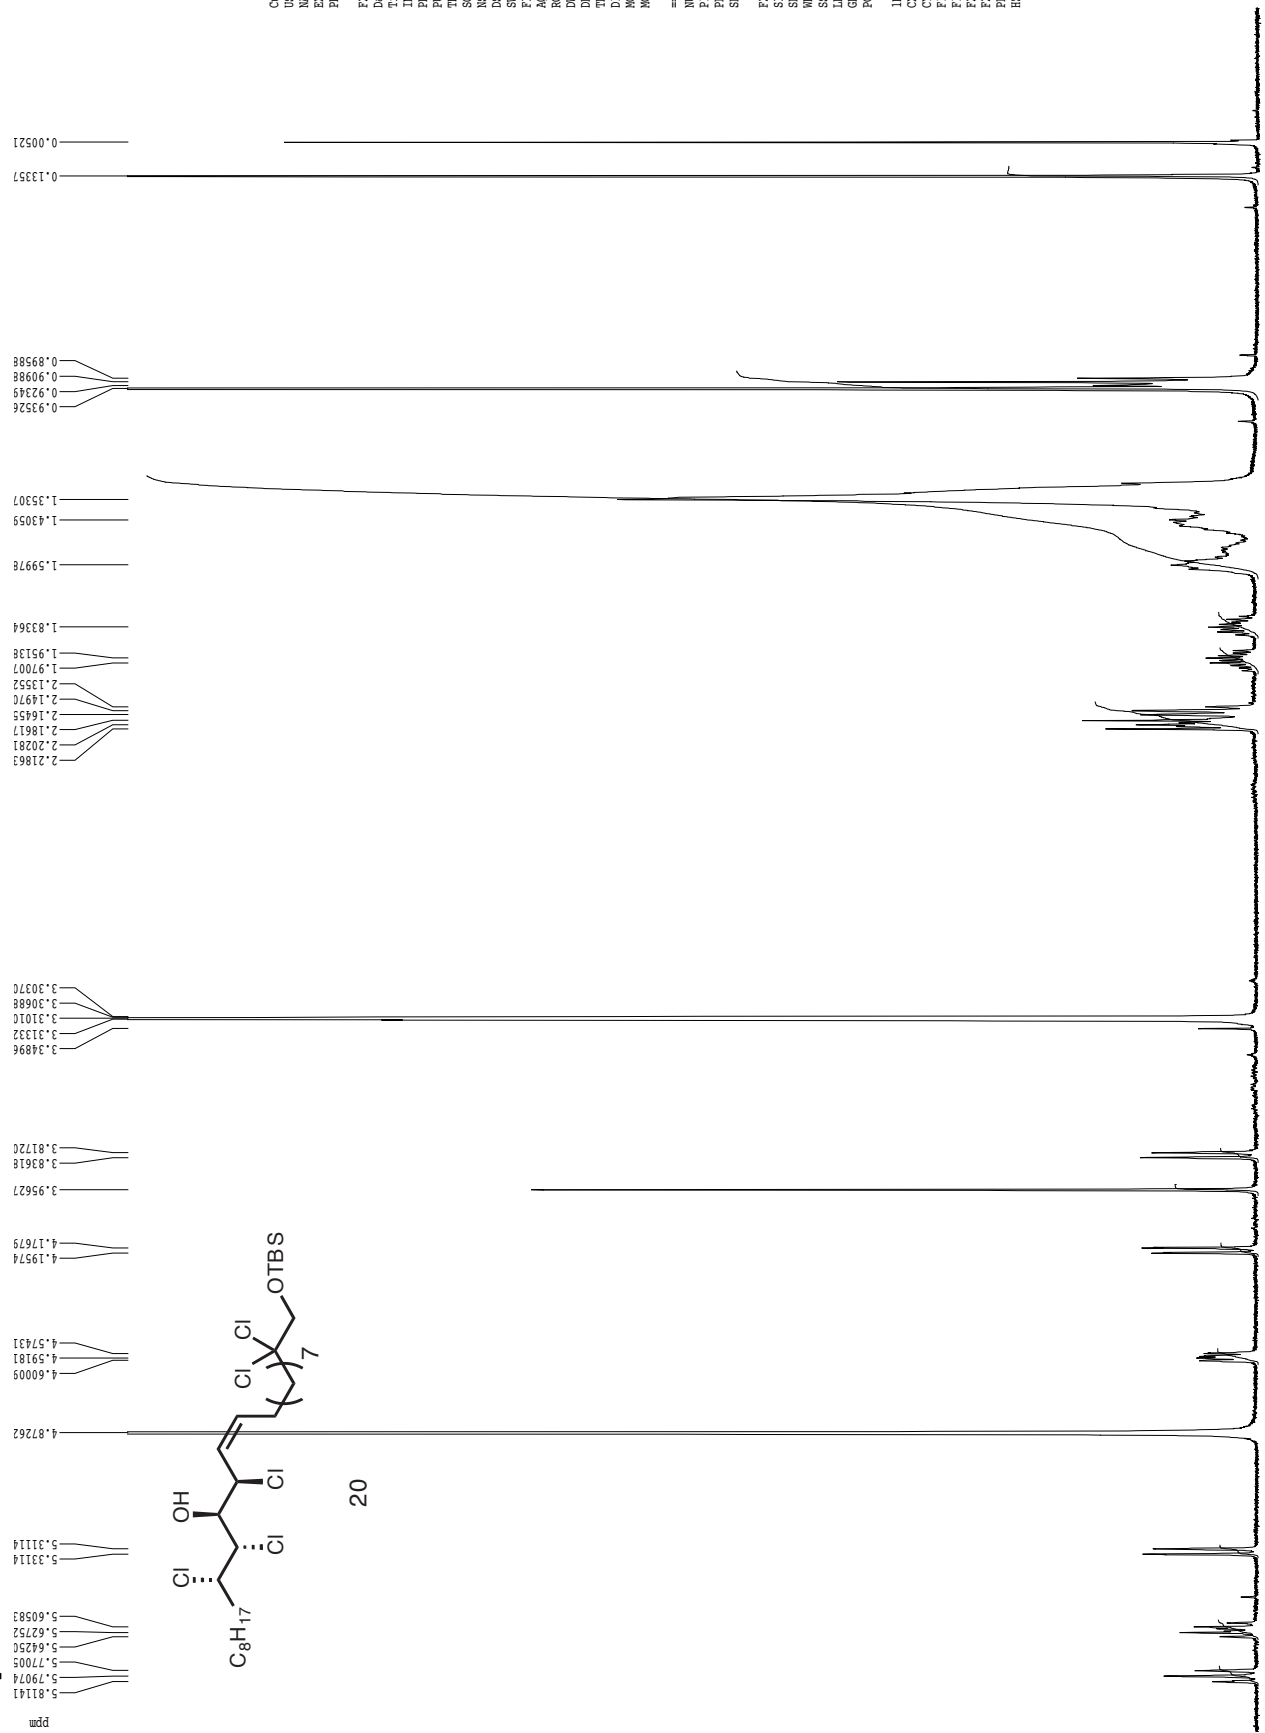

Current Data Parameters  
 USER dbedke  
 NAME DBA.317CD00D-4  
 EXPNO 1  
 PROCNO 1

F2 - Acquisition Parameters  
 Date\_ 20091107  
 Time 14.29  
 INSTRUM cryo500  
 PROBD 5 mm CPCLP1H-  
 PULPROG zgpg30  
 SOLVENT CDCl3  
 NS 8  
 DS 2  
 SWH 8012.820 Hz  
 FIDRES 0.098043 Hz  
 AQ 5.0998774 sec  
 RG 4.5  
 DW 62.400 usec  
 DE 6.00 usec  
 TE 298.0 K  
 D1 0.1000000 sec  
 ACRESF 0.0000000 sec  
 ACPRK 0.0150000 sec

==== CHANNEL f1 =====  
 NUC1 1H  
 P1 7.50 usec  
 PL1 1.60 dB  
 SFO1 500.2235015 MHz

F2 - Processing parameters  
 SI 65536  
 SF 500.220187 MHz  
 WDW no  
 SSB 0  
 LB 0.00 Hz  
 GB 0  
 PC 4.00

ID NMR plot parameters  
 CX 22.80 cm  
 CY 63.68 cm  
 FIP 6.000 ppm  
 F1 3001.32 Hz  
 F2P -0.500 ppm  
 F2 -250.11 Hz  
 PPMCM 0.28509 ppm/cm  
 HZCM 144.60660 Hz/cm

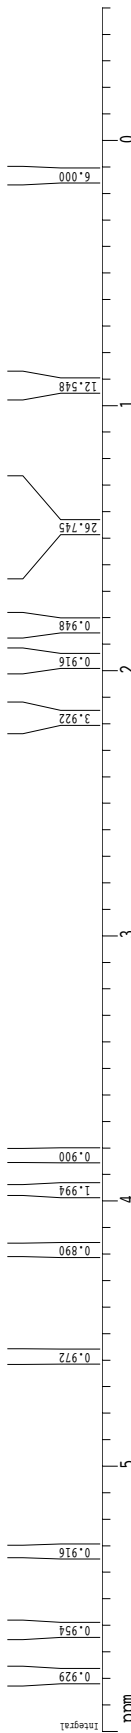

1H spectrum

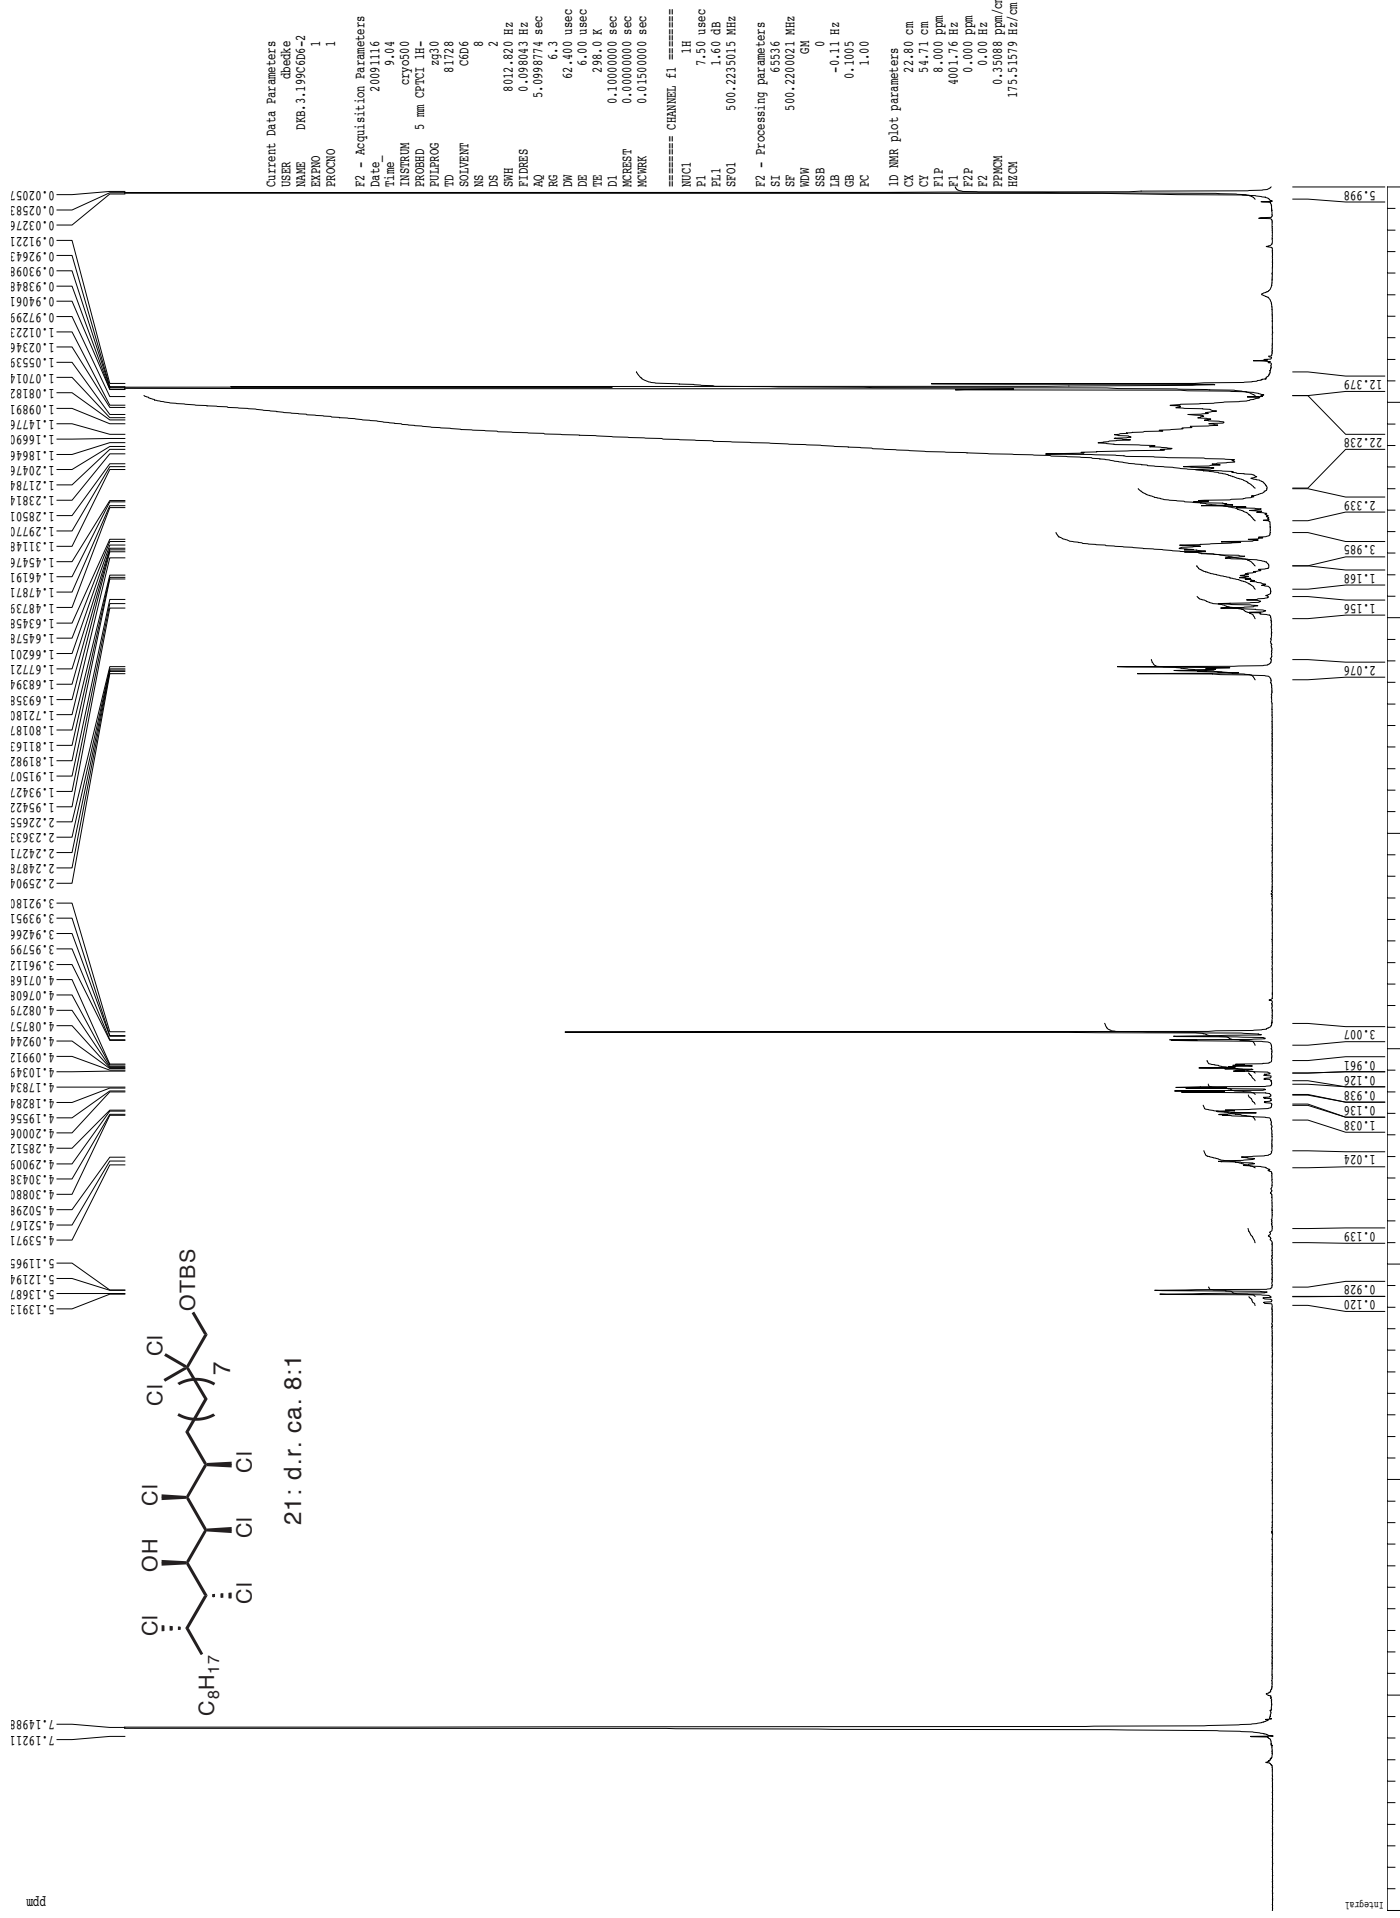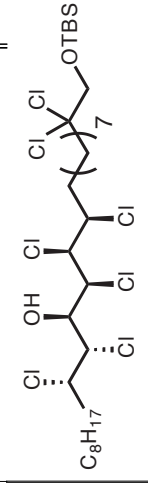

21 : d.r. ca. 8:1

1H spectrum

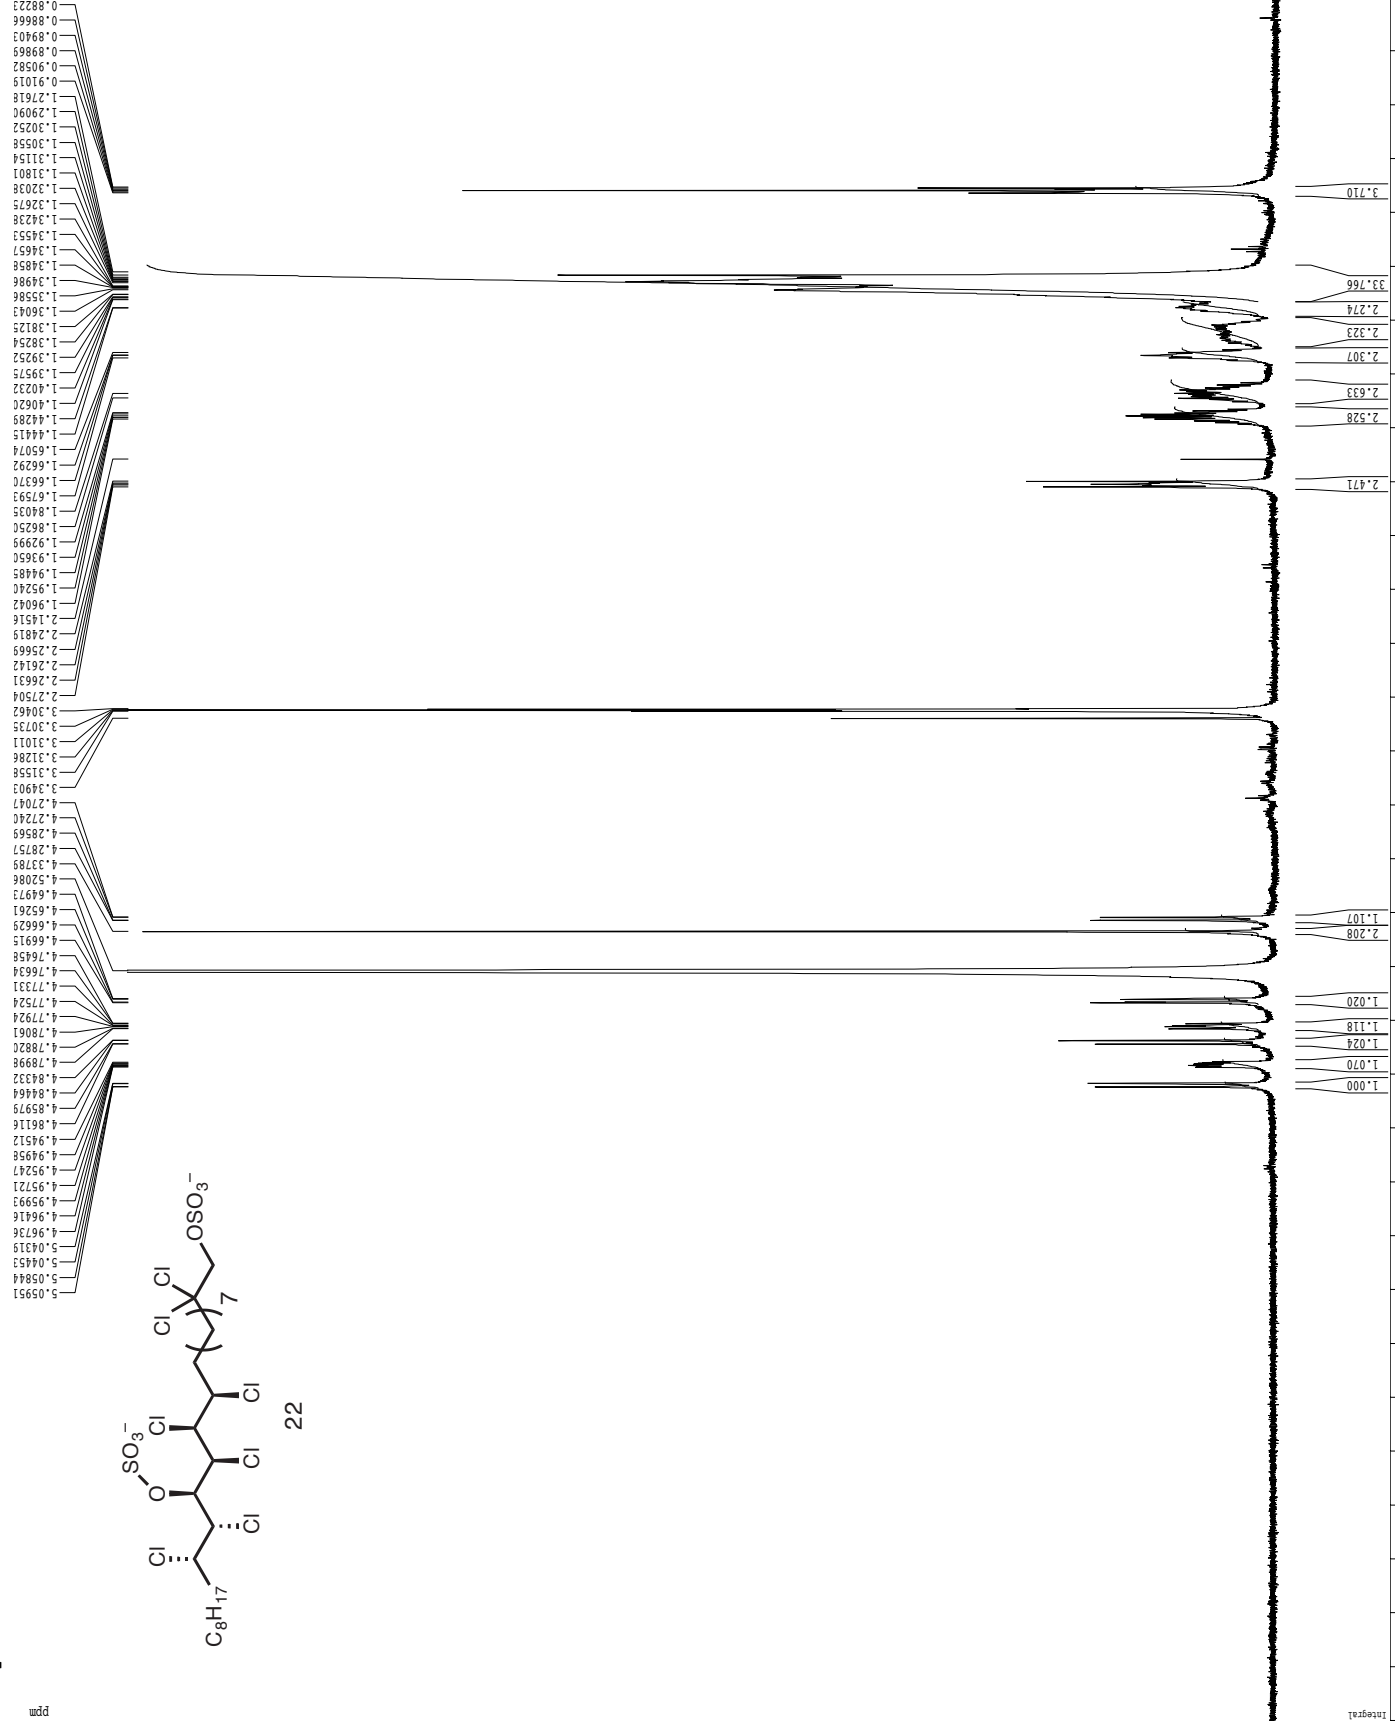

22

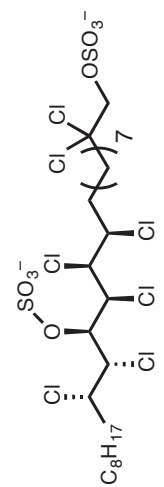

Current Data Parameters  
 USHR grants  
 WFR GS6\_147\_1F\_323K  
 PROCNO 9  
 PRCCHO 1

F2 - Acquisition Parameters  
 Date\_ 20091008  
 Time\_ 13.21  
 INSTRUM av600  
 PROBEID 5 mm TBI H1/13  
 PULPROG zg30  
 TD 97938  
 SOLVENT CD3OD  
 NS 16  
 DS 2  
 SWH 9613.385 Hz  
 FIDRES 0.098178 Hz  
 AQ 5.0928259 sec  
 RG 256  
 DW 52.000 usec  
 DE 1.00 usec  
 TE 300.0 K  
 D1 0.10000000 sec  
 TD0 1

===== CHANNEL f1 =====  
 NUC1 1H  
 P1 8.00 usec  
 PL1 -1.00 dB  
 SF01 600.1342009 MHz

F2 - Processing parameters  
 SI 65536  
 SF 600.1300191 MHz  
 GR  
 WDW EM  
 SSB 0  
 LB -0.61 Hz  
 GB 0.2885  
 PC 0.50

1D NMR plot parameters  
 CX 22.80 cm  
 CY 69.64 cm  
 F1P 8.000 ppm  
 F1 4801.04 Hz  
 F2P 0.000 ppm  
 F2 0.00 Hz  
 PPMCH 0.35088 ppm/cm  
 HZCM 210.57195 Hz/cm

# 1H spectrum

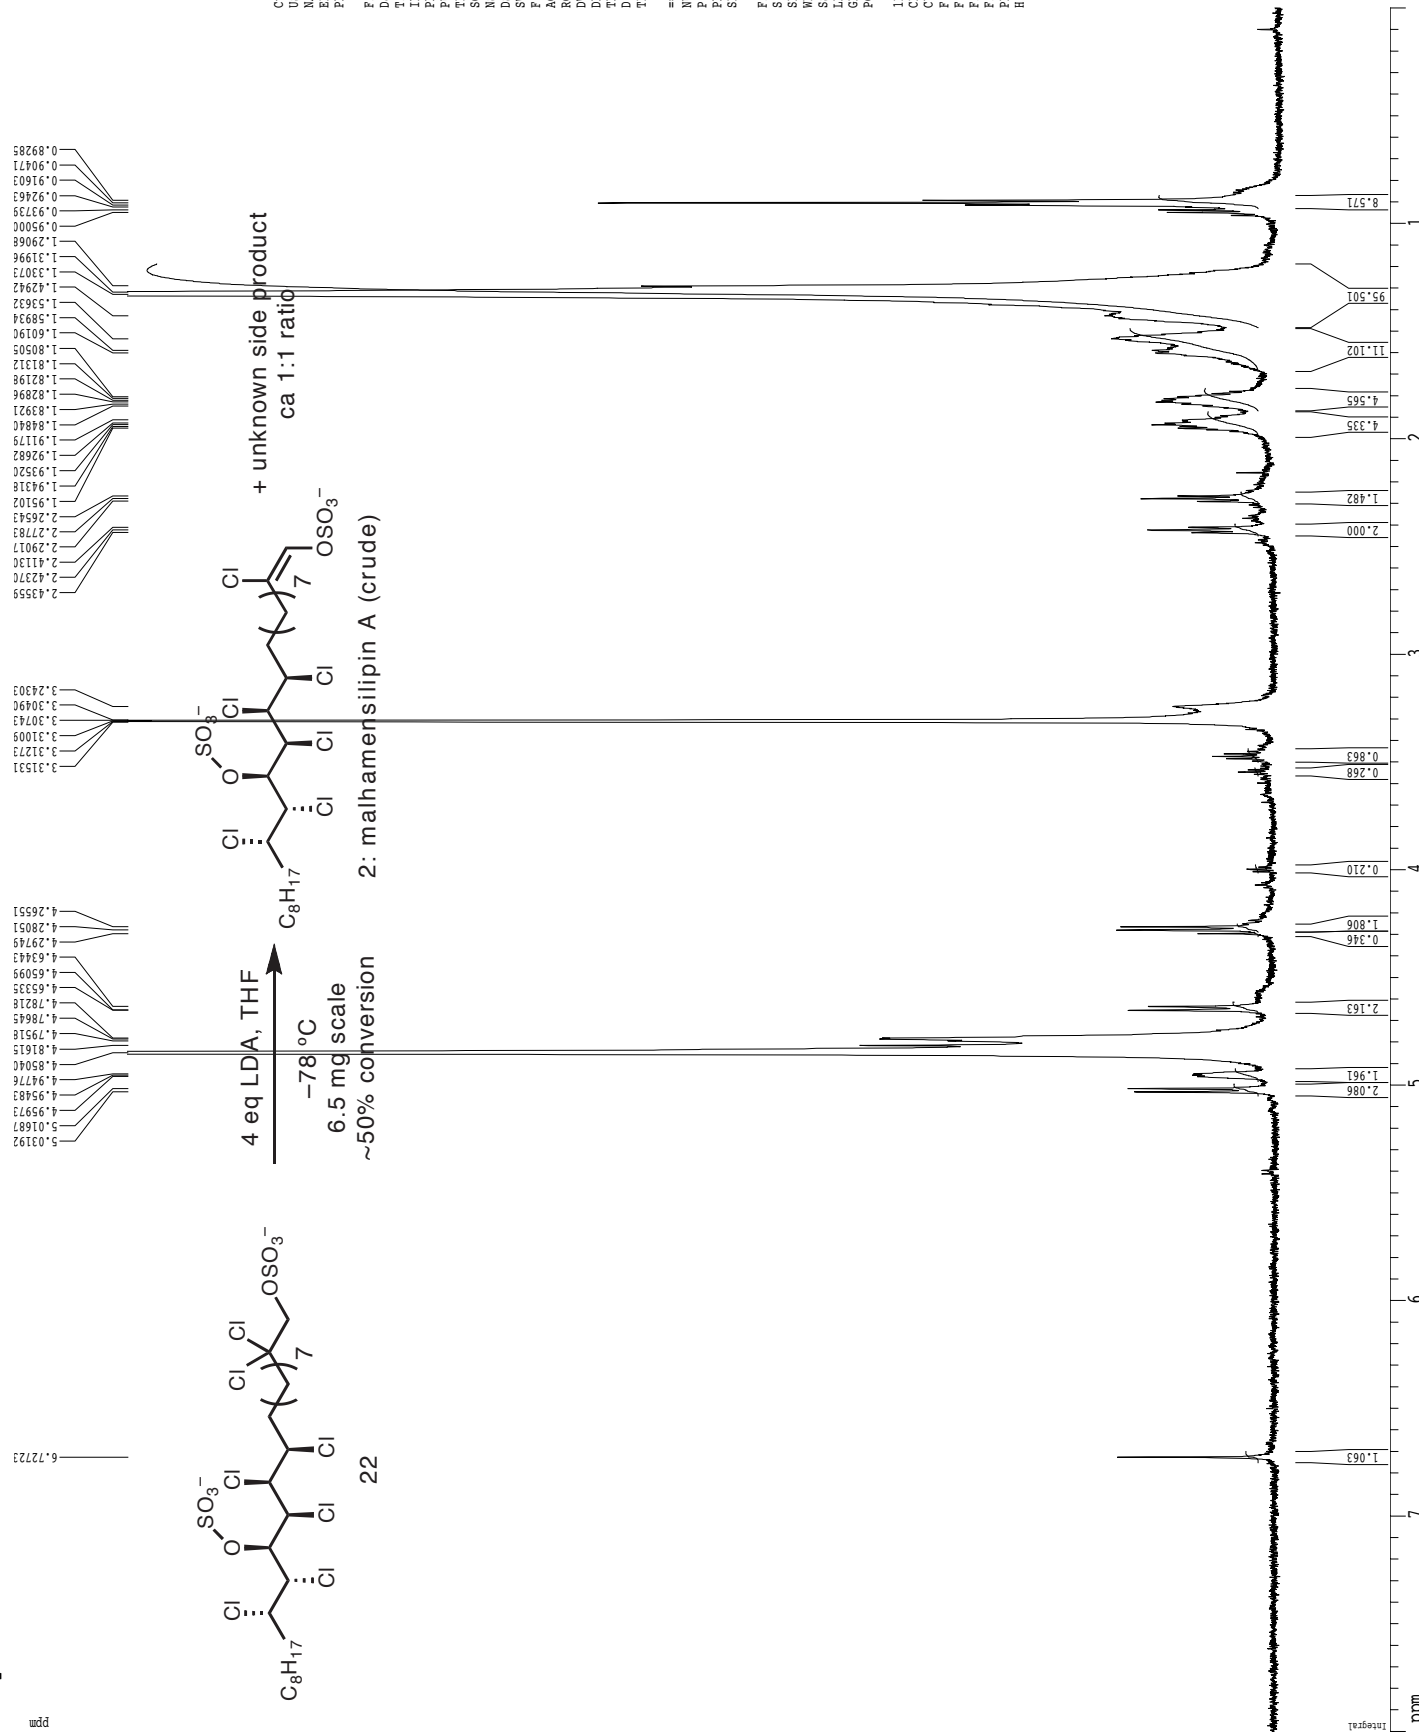

# <sup>1</sup>H spectrum

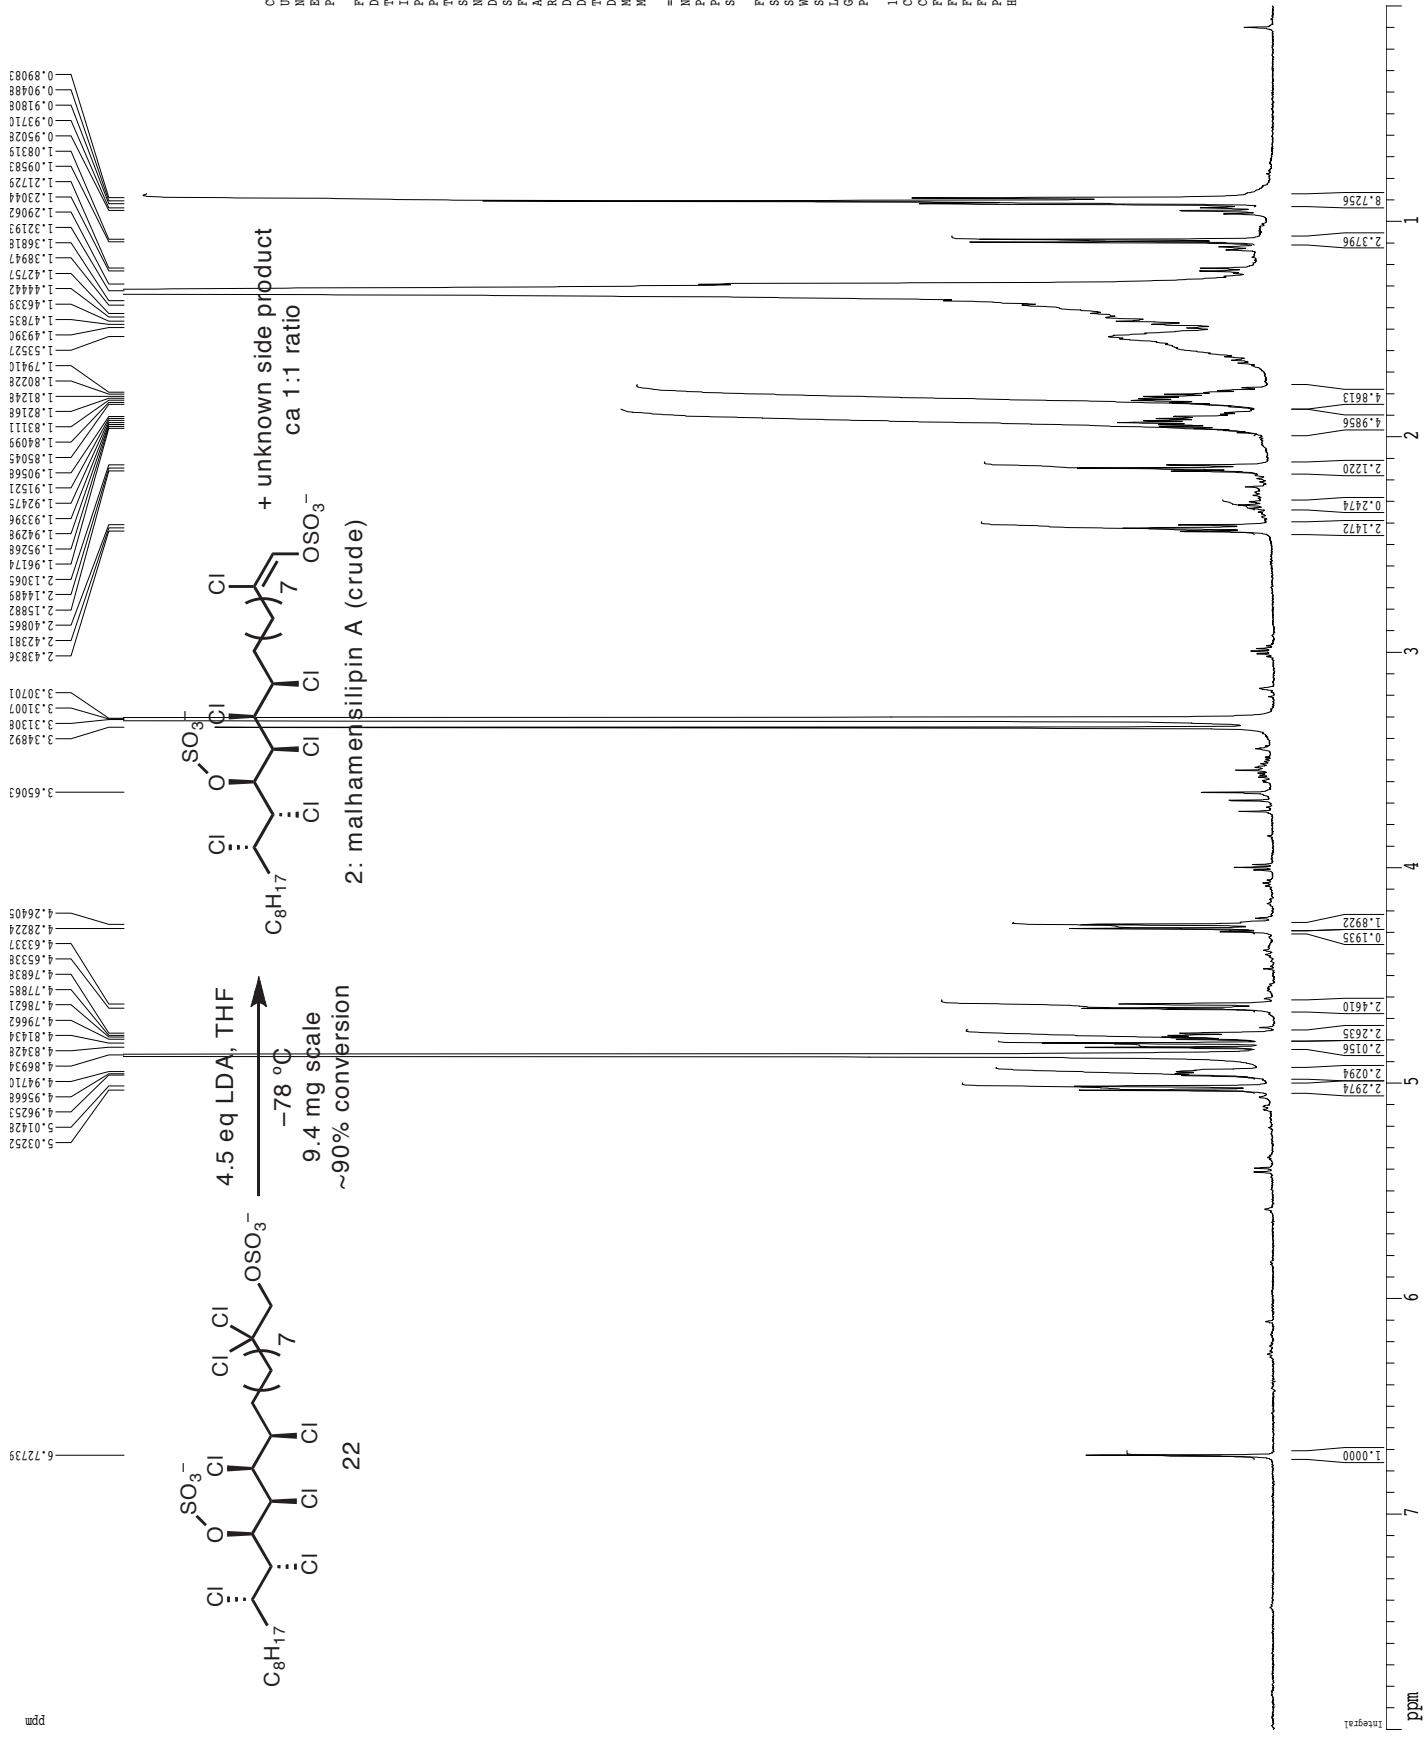

Current Data Parameters  
 USER grans  
 NAME GS6\_178\_c  
 EXPNO 1  
 PROCNO 1

F2 - Acquisition Parameters  
 Date\_ 20091205  
 Time 17.17  
 INSTRUM cryo500  
 PROBD 5 mm CPCLP-H-  
 PULPROG zgpg30  
 SOLVENT CDCl3  
 NS 16  
 DS 2  
 SWH 8012.820 Hz  
 FIDRES 0.098043 Hz  
 AQ 5.0998774 sec  
 RG 5.7  
 DW 62.400 usec  
 DE 6.00 usec  
 TE 298.0 K  
 D1 0.10000000 sec  
 ACRESF 0.00000000 sec  
 ACPRK 0.01500000 sec

===== CHANNEL f1 =====  
 NUCL1 <sup>1</sup>H  
 P1 7.50 usec  
 PL1 1.60 dB  
 SFO1 500.2235015 MHz

F2 - Processing parameters  
 SI 65536  
 SF 500.220188 MHz  
 WDW EN  
 SSB 0  
 LB 0.30 Hz  
 GB 0  
 PC 4.00

ID NMR plot parameters  
 CX 22.80 cm  
 CY 95.37 cm  
 F1P 8.000 ppm  
 F1 4001.76 Hz  
 F2P 0.000 ppm  
 F2 0.00 Hz  
 PPMCM 0.35088 ppm/cm  
 HZCM 175.51581 Hz/cm

Authentic malhamensilipin A, 330 K

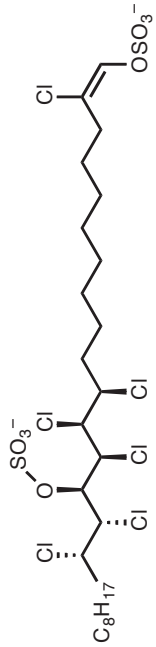

2: malhamensilipin A

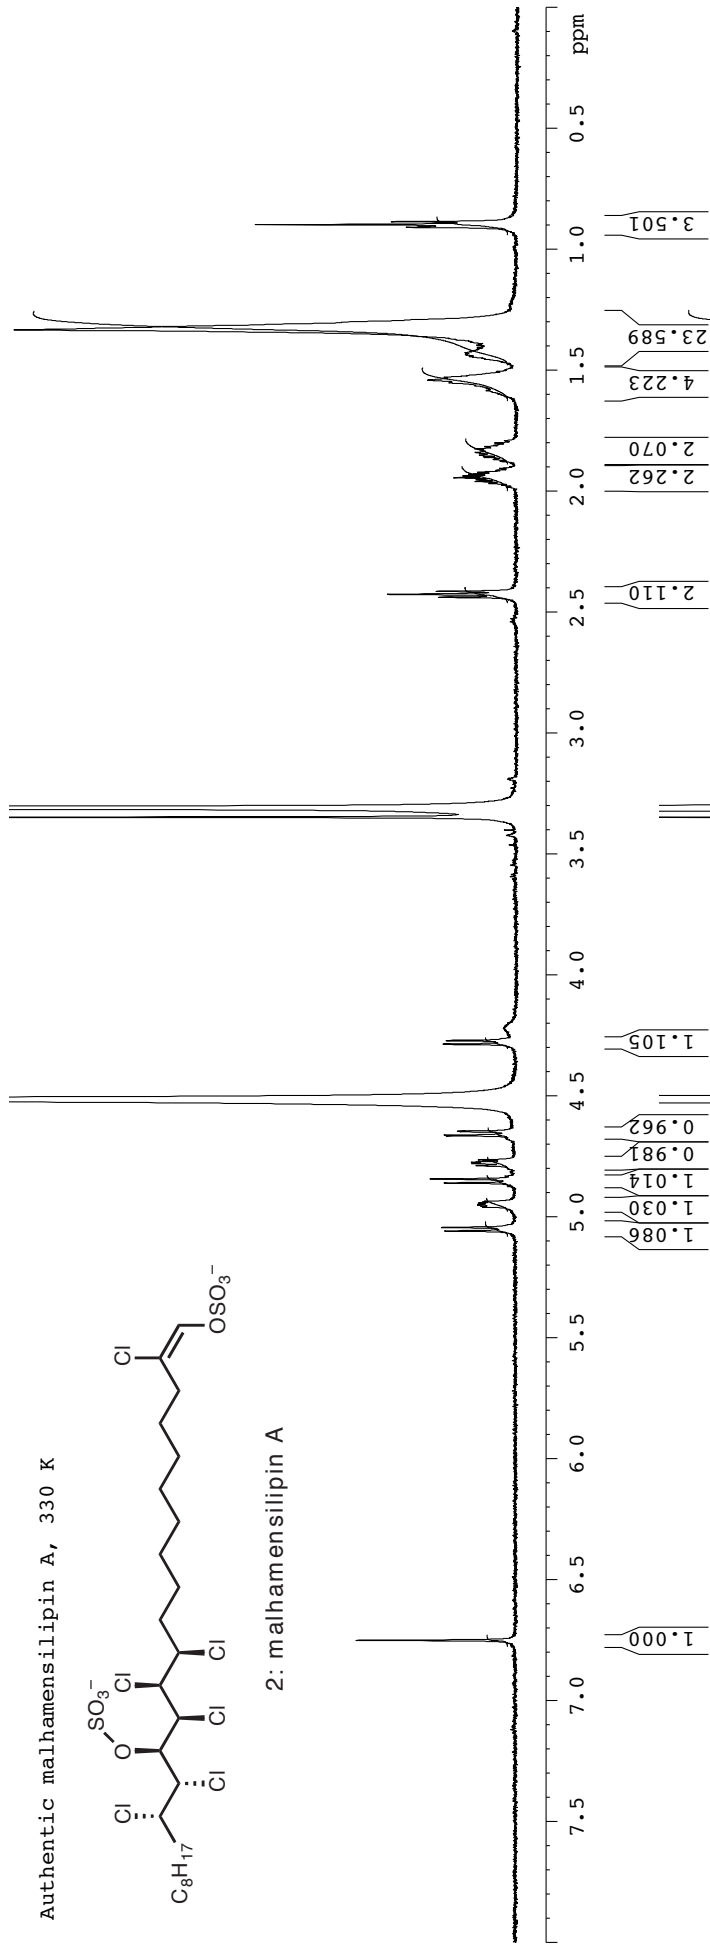

Synthetic malhamensilipin A, 330 K

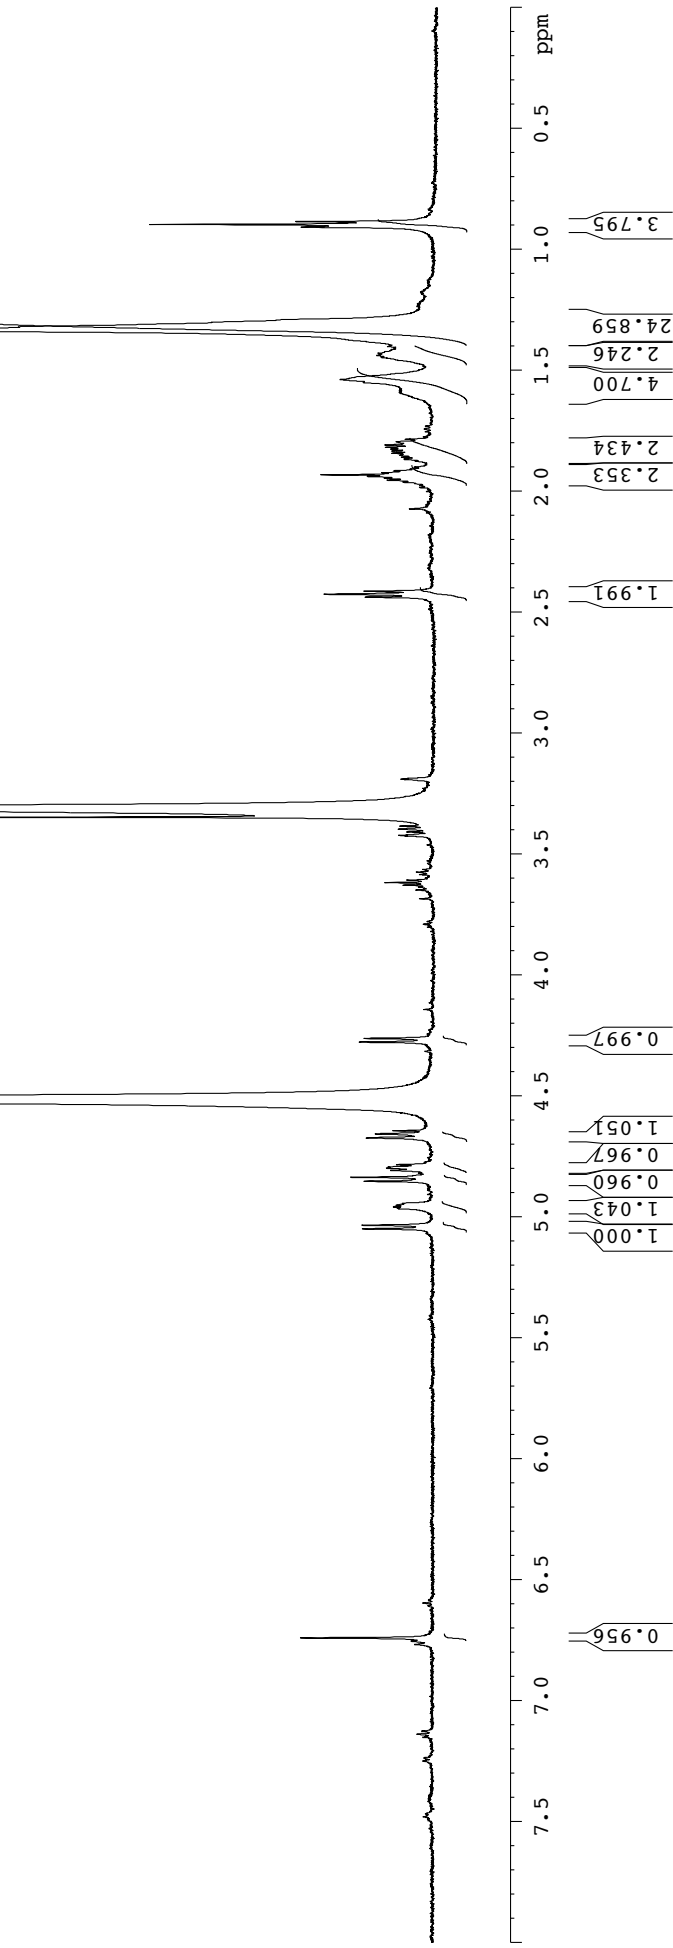

Z-restored spin-echo <sup>13</sup>C spectrum with <sup>1</sup>H decoupling

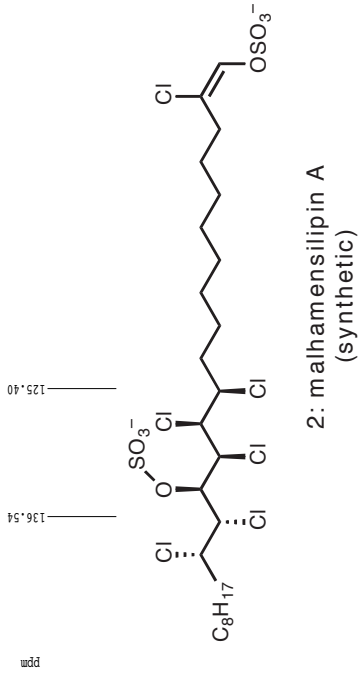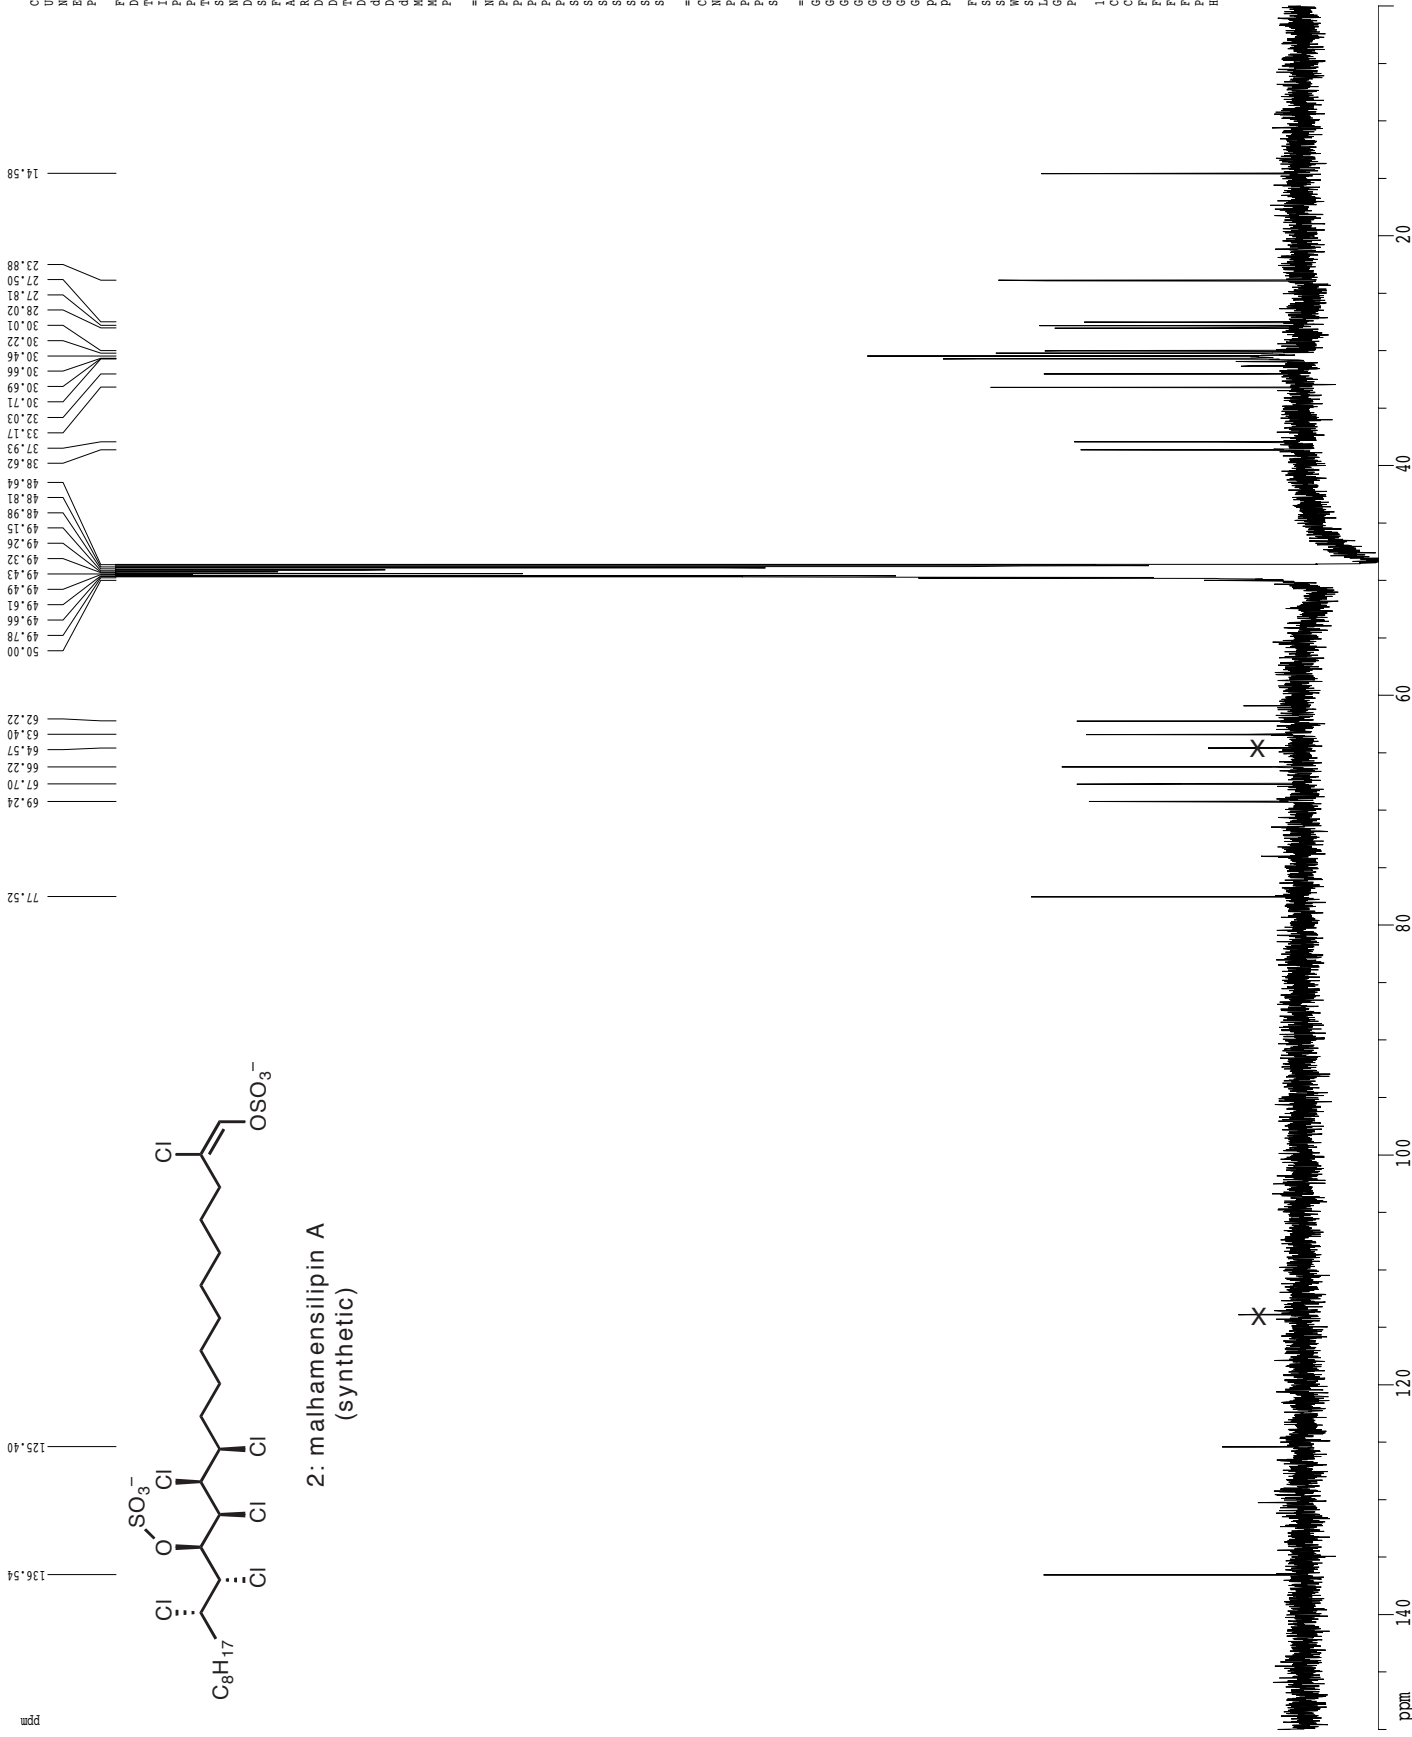

Current Data Parameters  
 USER grants  
 NAME GSG\_178\_13C-45-99  
 EXPNO 3  
 PROCNO 1  
 F2 - Acquisition Parameters  
 Date\_ 20091211  
 Time\_ 21:47  
 INSTRUM cryo500  
 PROBHD 5 mm CPYCI 1H-  
 PULPROG SpinEchoeg30pp.prd  
 TD 65418  
 SOLVENT CDCl3  
 NS 29514  
 DS 3  
 SWH 30303.033 Hz  
 FIDRES 0.463222 Hz  
 AQ 1.0794470 sec  
 RG 7298.2  
 DW 16.500 usec  
 DE 6.00 usec  
 TE 300.2 K  
 1.000000 sec  
 0.03000000 sec  
 d11 0.00020000 sec  
 d16 0.00020000 sec  
 d17 0.00019600 sec  
 ACQRESF 0.00000000 sec  
 MCNRRK 0.01500000 sec  
 P2 31.00 usec  
 ===== CHANNEL f1 =====  
 NUCL1 <sup>13</sup>C  
 P1 15.50 usec  
 PL1 500.00 usec  
 PL2 2000.00 usec  
 PL0 120.00 dB  
 PL1 -1.00 dB  
 SF01 125.7942548 MHz  
 SF1 3.20 dB  
 SF2 3.20 dB  
 GENAM1 Cp60.0.5.20.1  
 GENAM2 Cp60cm0.6  
 SFOFF1 0.00 Hz  
 SFOFF2 0.00 Hz  
 ===== CHANNEL f2 =====  
 CPDPRG2 waltz16  
 NUCL2 <sup>1</sup>H  
 PCPDZ 100.00 usec  
 PL1 2.00 dB  
 PL2 2.00 dB  
 SF02 500.2225013 MHz  
 ===== GRADIENT CHANNEL =====  
 GENAM1 STRH.100  
 GENAM2 STRH.100  
 GX1 0.00 %  
 GX2 0.00 %  
 GX3 0.00 %  
 GX4 0.00 %  
 GX5 0.00 %  
 GX6 0.00 %  
 GX7 0.00 %  
 GX8 0.00 %  
 GX9 0.00 %  
 GX10 0.00 %  
 p15 500.00 usec  
 p16 1000.00 usec  
 F2 - Processing parameters  
 SI 6556  
 SF 125.7802730 MHz  
 NWDW 0  
 SSB 0  
 LB 1.00 Hz  
 GB 0  
 PC 1.00  
 ID NMR plot parameters  
 CX 127.80 cm  
 CY 114.60 cm  
 F1 150.000 ppm  
 F1 18867.03 Hz  
 F2P 0.000 ppm  
 F2 0.00 Hz  
 FREQM 6.57895 ppm/cm  
 HZCM 827.50153 Hz/cm



Z-restored spin-echo 13C spectrum with 1H decoupling

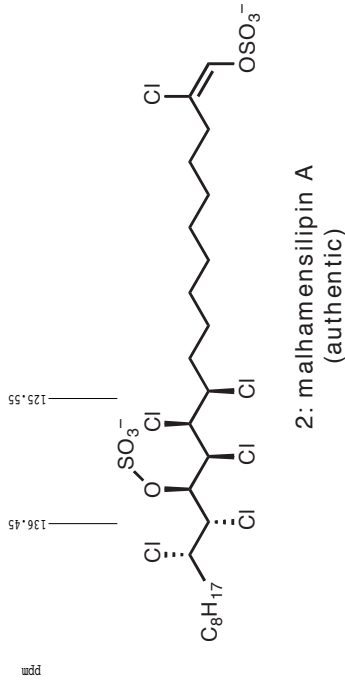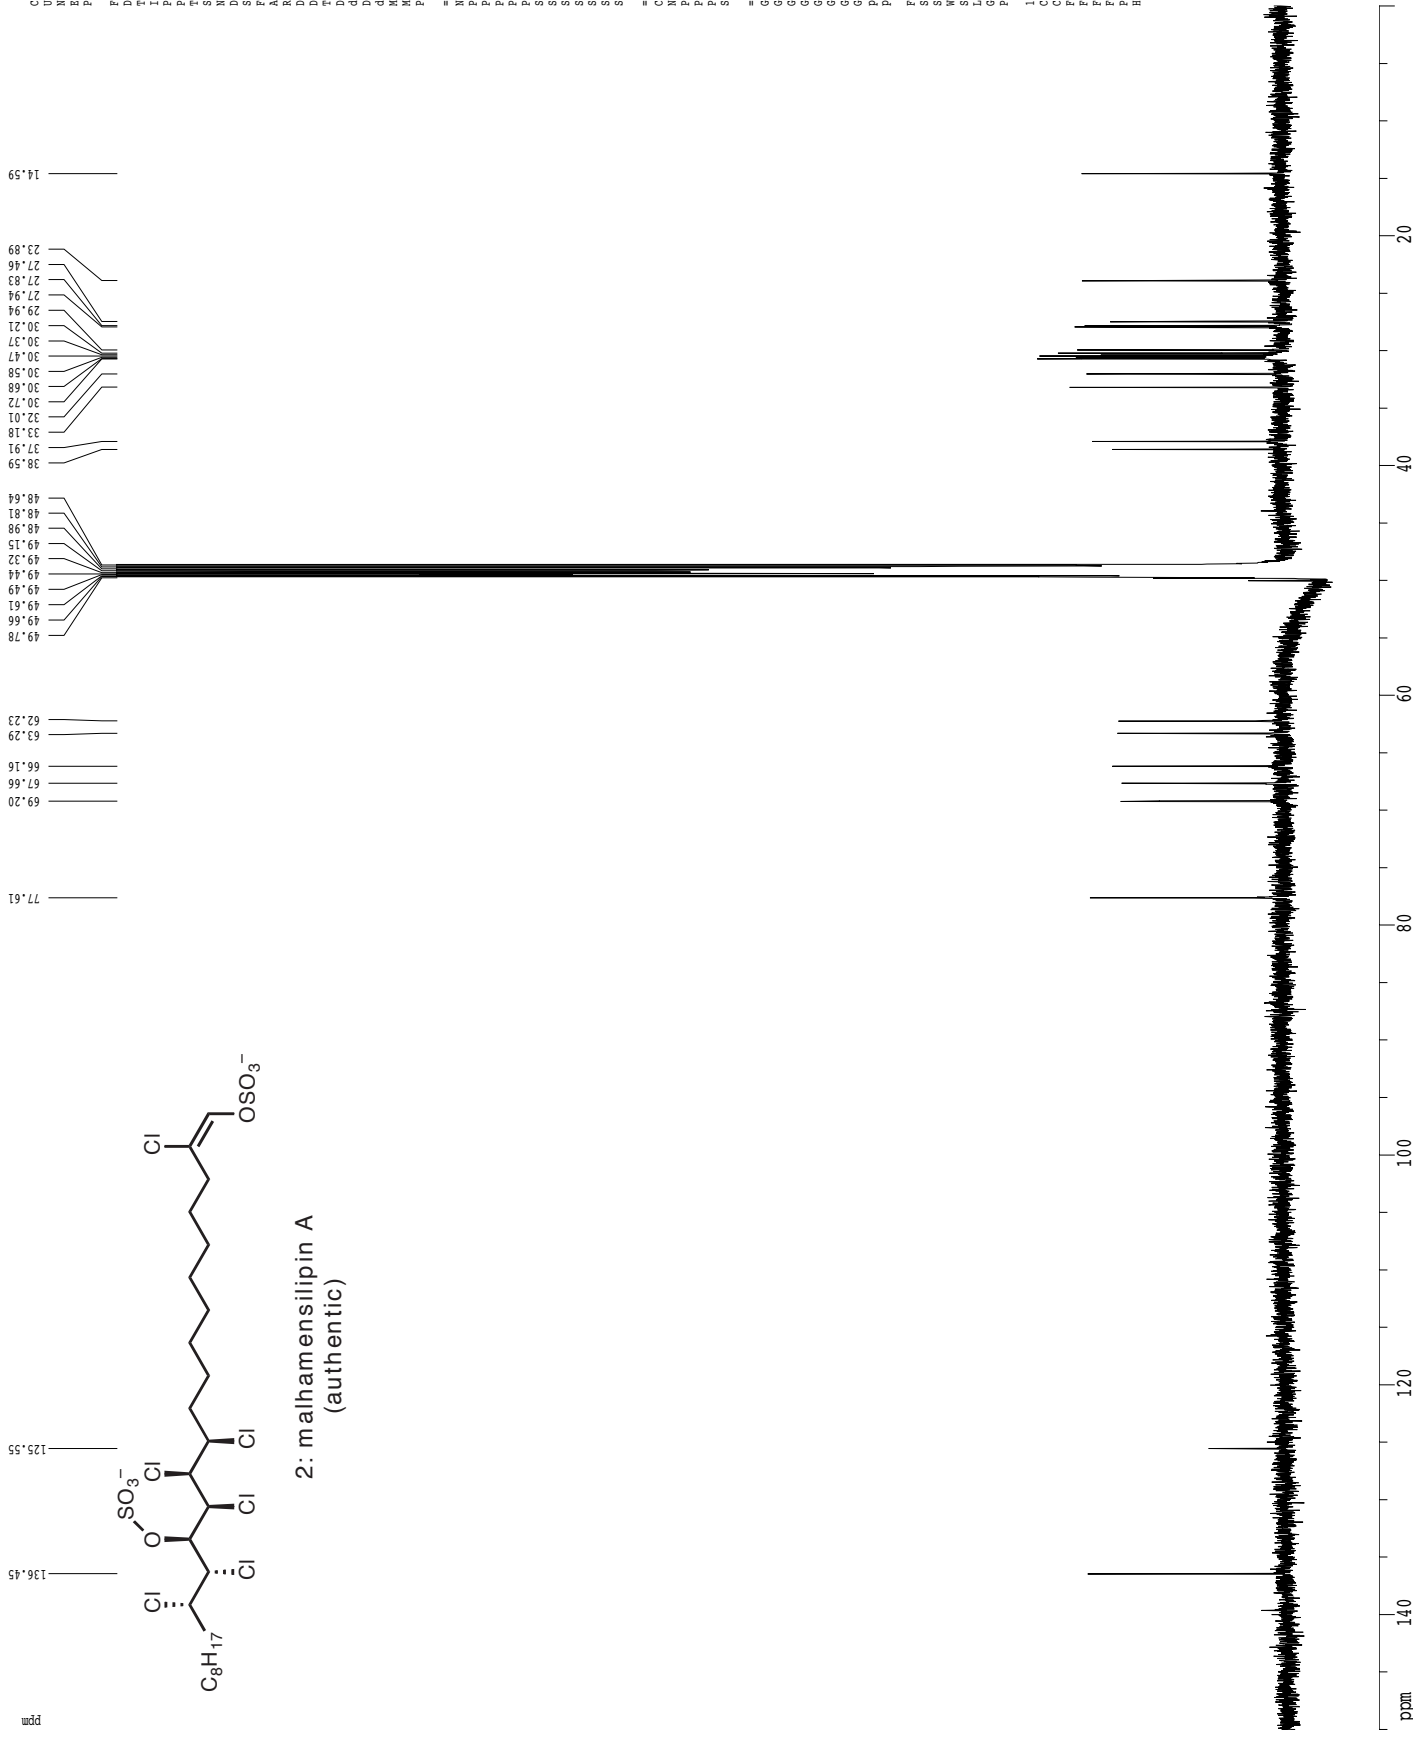

```

Current: Data Parameters
USER      grants
NAME      G86_178_nch_mala_13C
PROCNO    3
PROCNAME  1
F2 - Acquisition Parameters
Date_     2009.2.16
Time      20.25
INSTRUM   spect
PROBHD    5 mm CPXC-1H
PULPROG   Spinechop2omp.rpd
TD         65438
SOLVENT   CDCl3
NS         30720
DS         4
SFO        30303.031 Hz
FIDRES    0.463222 Hz
AQ         1.0784470 sec
RG         7298.2
DW         16.500 usec
DE         2.000 usec
TE         298.0 K
D1         0.25000000 sec
d11        0.03000000 sec
D16        0.00020000 sec
d17        0.00019600 sec
DELTA     0.00000000 sec
MCHRGF    0
MCHRG     0.01500000 sec
PC         31.00 usec

===== CHANNEL f1 =====
NUC1       13C
PC1        15.00 usec
P11        500.00 usec
P12        2000.00 usec
PL0        120.00 dB
PL1        -1.00 dB
SFO1      125.7942348 MHz
SF02      3.00 MHz
SF2        3.20 dB
SRAM1     C1p60.0.5.20.1
SRAM2     C1p60comp.4
SFOFF1    0.00 Hz
SFOFF2    0.00 Hz

===== CHANNEL f2 =====
CPRPG2    waltz16
NUC2       1H
PCPD2     100.00 usec
P1        14.00 usec
P2        24.00 dB
SFO2      500.225011 MHz

===== GRADIENT CHANNEL =====
GRAM1     SINE.100
GRAM2     SINE.100
GR1        0.00 %
GR2        0.00 %
GR3        0.00 %
GR4        0.00 %
GR5        30.00 %
GR6        30.00 %
GR7        500.00 usec
GR8        1000.00 usec

F2 - Processing parameters
SI         65536
SF          125.780223 MHz
NUC1       13C
SSB         0
LB         1.00 Hz
GB         0
PC         2.00

1D NMR plot parameters
CX         22.60 cm
CY         507.24 cm
FIP        150.000 ppm
F2         18867.03 Hz
F3         0.000000 Hz
F4         0.000000 Hz
PRGMCH     6.57895 ppm/cm
HZCM       827.50153 Hz/cm
    
```
